1     **A novel Single Alpha-Helix-DNA-binding domain in CAF-1 promotes gene silencing and**  
2     **DNA damage survival through tetrasome-length DNA selectivity and spacer function**

3

4

5     Ruben Rosas<sup>1,5</sup>, Rhiannon R. Aguilar<sup>2,3,5</sup>, Nina Arslanovic<sup>2</sup>, Jessica K. Tyler<sup>2,\*</sup> and Mair E. A.  
6     Churchill<sup>1,4,\*</sup>

7

8     1. Program in Structural Biology and Biochemistry, University of Colorado School of Medicine,  
9     Aurora, CO 80045, USA.

10    2. Department of Pathology and Laboratory Medicine, Weill Cornell Medicine, New York, NY  
11    10065, USA.

12    3. Weill Cornell/Rockefeller/Sloan-Kettering Tri-Institutional MD-PhD Program, New York,  
13    NY ,10065, USA

14    4. Department of Pharmacology, University of Colorado School of Medicine, Aurora, CO 80045,  
15    USA.

16    5. These authors contributed equally to this work.

17    \*Correspondence: [mair.churchill@cuanschutz.edu](mailto:mair.churchill@cuanschutz.edu) (M.E.A.C), [jet2021@med.cornell.edu](mailto:jet2021@med.cornell.edu) (J.K.T)

18    Department of Pharmacology and the Program in Structural Biology and Biochemistry

19    University of Colorado School of Medicine, Aurora, CO 80045, USA

20    Tel: 303-724-3670; FAX: 303-724-3663

21 **Abstract**

22           The histone chaperone chromatin assembly factor 1 (CAF-1) deposits nascent histone  
23 H3/H4 dimers onto newly replicated DNA forming the central core of the nucleosome known as  
24 the tetrasome. How CAF-1 ensures there is sufficient space for the assembly of tetrasomes  
25 remains unknown. Structural and biophysical characterization of the lysine/glutamic acid/arginine-  
26 rich (KER) region of CAF-1 revealed a 128 Å single alpha helix (SAH) motif with unprecedented  
27 DNA binding properties. Distinct KER sequence features and length of the SAH drive the  
28 selectivity of CAF-1 for tetrasome-length DNA and facilitate function in budding yeast. *In vivo*, the  
29 KER cooperates with the DNA-binding winged helix domain in CAF-1 to overcome DNA damage  
30 sensitivity and maintain silencing of gene expression. We propose that the KER SAH links  
31 functional domains within CAF-1 with structural precision, acting as a DNA binding spacer  
32 element during chromatin assembly.

### 33 **Introduction**

34

35 In eukaryotes, dynamic local and global chromatin structures regulate accessibility to the  
36 genome for all DNA dependent processes(Yadav, Quivy, and Almouzni, 2018; Klemm, Shipony,  
37 and Greenleaf, 2019). The nucleosome is the fundamental unit of chromatin, comprising two  
38 H3/H4 and two H2A/H2B histone dimers wrapped by approximately 147 bp of DNA(Luger et al.,  
39 1997). DNA replication requires the disassembly of parental nucleosomes, followed by a highly-  
40 regulated dynamic assembly process for recycling of parental histones and depositing nascent  
41 histones onto the newly replicated DNA(Smith and Stillman, 1991; Escobar, Loyola, and Reinberg,  
42 2021). The histone chaperone chromatin assembly factor 1 (CAF-1) facilitates the dimerization of  
43 nascent H3/H4 dimers onto replicated DNA, forming the subnucleosomal structure known as the  
44 tetrasome(Smith and Stillman, 1989; Kaufman et al., 1995; Mattiroli et al., 2017a; Sauer et al.,  
45 2017; Sauer et al., 2018).

46 In multicellular organisms, the essential functions of CAF-1 are required for the  
47 maintenance of epigenetic landscapes and gene expression patterns(Cheloufi et al., 2015;  
48 Cheloufi and Hochedlinger, 2017; Smith and Whitehouse, 2012; Ramachandran and Henikoff,  
49 2016; Sauer et al., 2018). How CAF-1 deposits H3/H4 at sites of DNA synthesis remains largely  
50 unknown. However, the identification of functional domains within CAF-1 has provided significant  
51 insight. Three subunits: Cac1, Cac2 and Cac3, form the CAF-1 complex(Sauer et al., 2018; Smith  
52 and Stillman, 1989). Central to the localization of CAF-1 to replicated DNA are interactions with  
53 the replisome through PCNA interacting peptides (PIP box) in the Cac1 subunit(Shibahara and  
54 Stillman, 1999; Krawitz, Kama, and Kaufman, 2002). Additionally, the DNA binding function of the  
55 Winged Helix Domain (WHD) located in Cac1 contributes to the recruitment of CAF-1 to sites of  
56 replication(Sauer et al., 2017; Zhang et al., 2016; Mattiroli et al., 2017b).

57 DNA binding studies of the *Saccharomyces cerevisiae* CAF-1 (yCAF-1) revealed a  
58 preference for binding to DNA that is at least 40 bp long(Sauer et al., 2017), which is slightly less

59 than the length of DNA needed to form a tetrasome(Luger et al., 1997; Donham, Scorgie, and  
60 Churchill, 2011). As the WHD binds to short (10-16 bp) DNA fragments(Zhang et al., 2016;  
61 Mattioli et al., 2017b), it is unlikely to confer this DNA length dependence to CAF-1 or allow for  
62 sufficient spacing for the assembly of tetrasomes *in vivo*. However, the lysine/glutamic  
63 acid/arginine-rich (KER) region of the Cac1 subunit has been implicated as a possible second  
64 DNA-binding domain, as CAF-1 lacking the WHD could still bind to DNA(Sauer et al., 2017).  
65 Whether the KER cooperates with the WHD or PIP box to recruit CAF-1 to sites of DNA synthesis,  
66 contributes to the length-dependent DNA recognition of CAF-1, or has other biological roles  
67 remains unclear.

68 Here, we characterized the KER region of yCAF-1 using biophysical, structural, and  
69 functional approaches *in vitro* and in budding yeast. The crystal structure of the KER and DNA  
70 binding experiments revealed a novel single alpha helix (SAH) domain with DNA binding ability  
71 that we found drives the selectivity of yCAF-1 for tetrasome-length DNA. Features of the structure  
72 and sequence of the KER SAH required for DNA binding were defined. In yeast, the KER structure  
73 is important for CAF-1 mediated chromatin assembly through cooperation with the WHD during  
74 DNA damage repair and gene silencing.

## 75 **Results**

76

### 77 **The KER is a major DNA binding domain in CAF-1 that cooperates with the WHD *in vivo*.**

78 The previously observed DNA length preference of yCAF-1 ([Sauer et al., 2017](#)) cannot be  
79 explained by the DNA-binding properties of the WHD ([Zhang et al., 2016](#); [Mattioli et al., 2017a](#);  
80 [Sauer et al., 2017](#)). To determine whether the KER promotes this DNA length preference, we first  
81 expressed and purified recombinant tri-subunit yCAF-1, KER (Cac1 residues 136–225, yKER),  
82 and WHD (Cac1 residues 457–606, yWHD) (Figure 1a and Figure 1-figure supplement 1a-c).  
83 Using electrophoretic mobility shift assays (EMSA) we measured the binding affinity for each  
84 protein to DNA fragments of different lengths (Figure 1b-i and Figure 1-figure supplement 2a,b).  
85 To determine the DNA binding affinities, the EMSA images were quantitated and the resulting  
86 binding curves fitted with Equation 1 (see Methods) (Figure 1j,k and Figure 1-figure supplement  
87 2c), which gave values for the dissociation constant ( $K_D$ ) and cooperativity (Hill coefficient,  $h$ )  
88 (Figure 1l). yCAF-1 and the isolated domains bound to DNA with the appearance of a ladder of  
89 bands, especially for the yKER that has the largest number of bands, which are related to the  
90 length of the DNA fragment (20, 30, 40 and 80 bp). These results indicate that multiple proteins  
91 bind to a single DNA fragment (Figure 1f-i) and the Hill coefficients suggest a cooperative mode  
92 of DNA binding (Figure 1l). For DNA of the same length (Figure 1l), the yKER had  $K_D$  values  
93 between 18 to 50 nM, whereas the yWHD bound 3 to 6 times more weakly. yCAF-1 had  $K_D$  values  
94 between those observed for the yKER and the yWHD, except for weaker binding to the 30 bp  
95 DNA fragment ( $K_D$  of 330 nM) (Figure 1l). This analysis shows that yCAF-1 has a higher affinity  
96 for DNA fragments in the range of 50-80 bp, which are DNA lengths considered to be sufficient  
97 for tetrasome formation ([Donham, Scorgie, and Churchill, 2011](#)). In contrast, increasing DNA  
98 length only slightly decreased  $K_D$  values for the yKER or yWHD (Figure 1l).

99 To determine the importance of the KER to the DNA binding function of yCAF-1, yCAF-1  
100 lacking only the KER, Cac1 residues 136–225 (yCAF1  $\Delta$ KER), was produced (Figure 1-figure

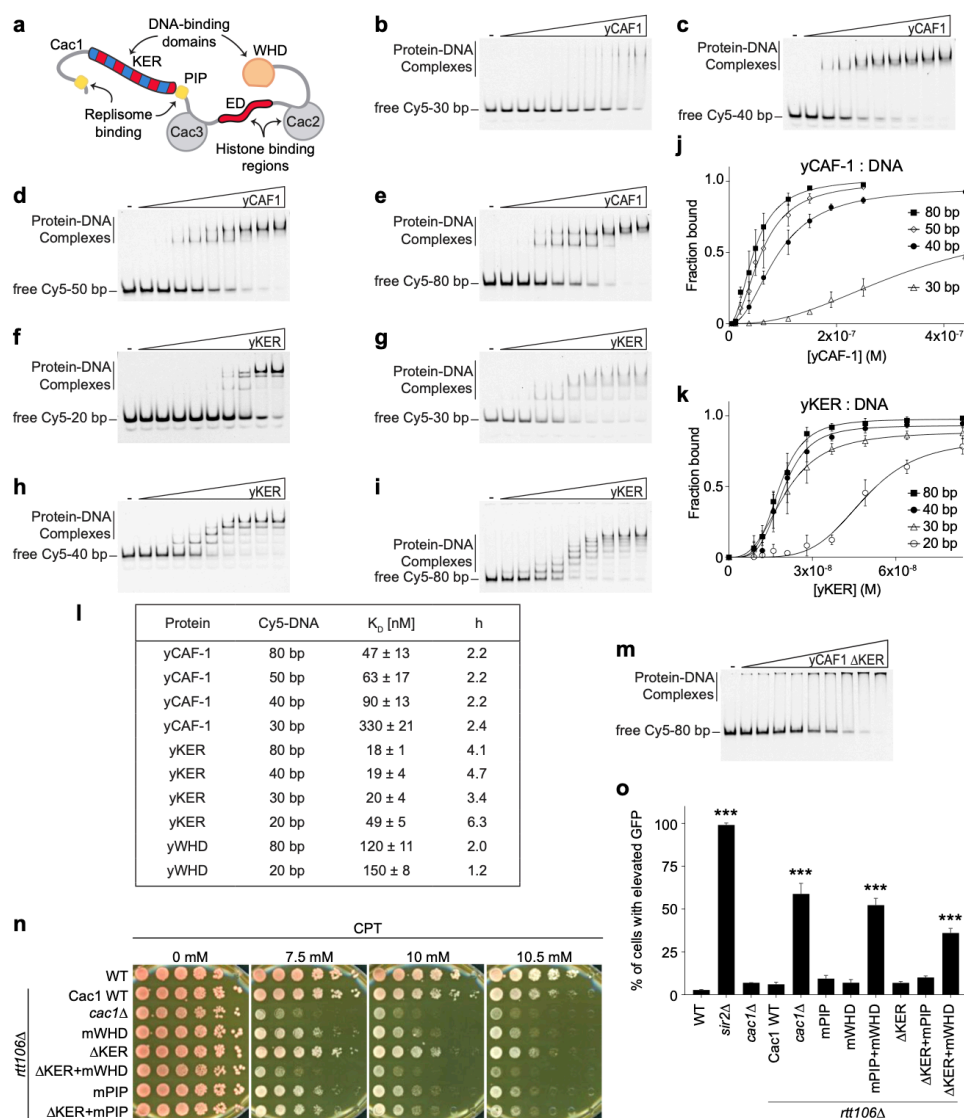

101

102 **Figure 1. The yKER region favors binding to tetrasome-length DNA and facilitates the function of**  
 103 **yCAF-1 in vivo.** **a**, Cartoon representing the molecular architecture of the yCAF-1 complex highlighting the  
 104 protein subunits and functional domains. Domains include the K/E/R-rich (DNA-binding domain), PCNA  
 105 interacting peptides (PIP boxes), Cac3 binding site (small), E/D-rich regions (histone binding), Cac2 binding  
 106 site (Middle), and a DNA-binding winged helix domain (WHD). **b-i**, Representative images of EMSA  
 107 experiments for yCAF-1 or yKER, with 2 or 3 nM of Cy5-DNA; the range of protein concentrations are: 5–  
 108 250 nM and 9–84 nM, respectively. **j,k**, Quantitative analyses of all EMSAs of yCAF-1 or yKER with Cy5-  
 109 labeled DNA. Data from at least three independent experiments were plotted as the mean and standard  
 110 deviation (error bars). The binding curves were fitted using Eqn. 1. **l**, Table summarizing the dissociation  
 111 constant ( $K_D$ ) and Hill coefficient (h) values obtained from EMSAs of the indicated proteins and DNA. Values  
 112 were obtained from fitting plots using Eqn. 1. **m**, Representative image of an EMSA experiment for yCAF-  
 113 1  $\Delta$ KER with 3 nM of Cy5-80 bp DNA; the range of protein concentrations is 49–440 nM. **n**, Yeast spot  
 114 assay with 5-fold serial dilutions of cultures of the indicated strains; grown in the presence of CPT at the  
 115 specified concentrations. **o**, Bar graph indicating the percentage of cells exhibiting elevated GFP levels  
 116 from yeast cultures of the indicated strains sorted by flow cytometry. Error bars indicate the standard  
 117 deviation of the calculated values from three measurements. Statistical significance was calculated by  
 118 Student's *t*-test where \* =  $p < 0.05$ , \*\* =  $p < 0.01$ , and \*\*\* =  $p < 0.001$  relative to Cac1 WT cells. See also Figure  
 119 1 - Source data 1 and Source data 2.

120 supplement 1a) and tested using EMSA. Deletion of the KER region impaired DNA binding  
121 of yCAF-1 and also resulted in the failure of the complexes to migrate into the gel, possibly due  
122 to aggregation (Figure 1m). As the yCAF-1  $\Delta$ KER mutant still has the WHD, this residual DNA  
123 binding function might be due to the WHD or other unknown DNA-binding regions within CAF-1.  
124 Together, these data show that the KER binds more tightly to DNA than the WHD and the  
125 presence of the KER in the context of yCAF-1 is needed for high DNA-binding affinity.

126 As the KER confers the majority of DNA binding affinity to yCAF-1 *in vitro*, we investigated  
127 the impact of deleting the KER on CAF-1 function in chromatin assembly after DNA replication  
128 and repair ([Smith and Stillman, 1991](#); [Ye et al., 2003](#); [Smith and Stillman, 1989](#); [Gaillard et al.,](#)  
129 [1996](#); [Mello et al., 2002](#); [Tyler et al., 1999](#)). Yeast cells harboring defective CAF-1, including loss  
130 of the Cac1 subunit, or loss of its WHD, PIP box, or histone binding regions (Figure 1a), have  
131 been shown to be more sensitive to DNA damaging agents and have impaired establishment of  
132 chromatin landscapes ([Li et al., 2008b](#); [Zhang et al., 2016](#)). We examined cell growth and survival  
133 of budding yeast mutants in a spot assay in the presence of the DNA topoisomerase I inhibitor  
134 Camptothecin (CPT) ([Eng et al., 1988](#)) and Zeocin. While CPT stabilizes covalently bound DNA  
135 topoisomerase I complexes on chromatin resulting in replication fork collisions and DNA double-  
136 strand breaks (DSBs) ([Pommier, 2006](#)), Zeocin intercalates into DNA to induce DSBs  
137 independent of the replication process ([Chankova et al., 2007](#)). yCAF-1 mutants were generated  
138 by site-directed mutagenesis of the gene that encodes the Cac1 subunit (*CAC1*) via CRISPR-  
139 Cas9 at the endogenous genomic locus in yeast strains deleted for the *RTT106* gene (*rtt106* $\Delta$ )  
140 that encodes for a histone chaperone with overlapping roles of CAF-1 in yeast ([Huang et al.,](#)  
141 [2005](#); [Li et al., 2008a](#)) (Figure 1-figure supplement 1d). Deletion of Cac1 residues 136–225 that  
142 encode for the KER region ( $\Delta$ KER) resulted in a mild sensitivity to CPT and Zeocin (Figure 1n  
143 and Figure 1-figure supplement 2d). Inhibition of the DNA binding function of the WHD through  
144 point mutations in Cac1 residues K564E/K568E (mWHD) in yeast ([Zhang et al., 2016](#)) showed  
145 higher sensitivity to CPT and Zeocin than the deletion of the KER. Strikingly, the double mutant

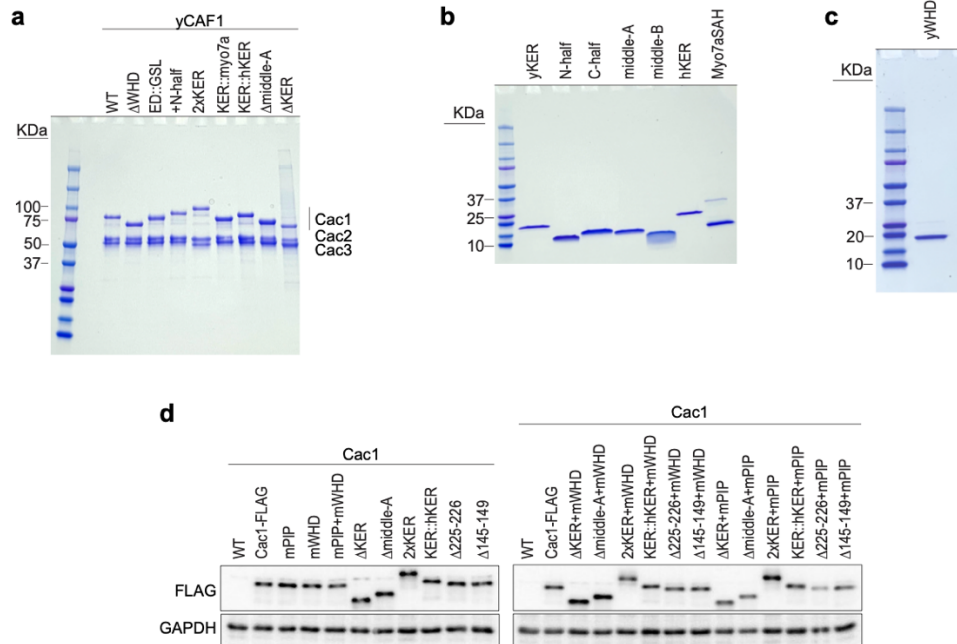

146

147 **Figure 1-figure supplement 1. Quality of proteins used in this study.** a-c, 4-20 % gradient  
 148 SDS-PAGE stained with Coomassie Blue of the indicated purified protein domains (**b and c**) or  
 149 yCAF-1 complexes (**a**). **d**, Western Blot of yeast cell lysates harboring the indicated Cac1  
 150 mutations along with a FLAG tag motif incorporated at the C-terminus of Cac1. An anti-FLAG  
 151 antibody was used to detect expression of the FLAG-tagged Cac1 proteins from cell lysates. An  
 152 anti-GAPDH antibody was used to determine the levels of GAPDH protein from the cell lysates  
 153 as a loading control. See also Figure 1 - figure supplement 1 - Source data 1.  
 154



155  $\Delta$ KER+mWHD showed higher CPT and Zeocin sensitivity than either mutant alone, and to a  
156 similar extent observed when the Cac1 subunit is absent (*cac1* $\Delta$ ) (Figure 1n, Table 1 and Figure  
157 1-figure supplement 2d). These results are consistent with roles for both the KER and WHD in  
158 CAF-1 function because at least one DNA-binding domain appears to be sufficient to maintain  
159 some CAF-1 function *in vivo* and overcome repercussions of DSBs, both dependent and  
160 independent of DNA replication.

161 We also investigated a potential coordinated role between the KER and the PIP box for the  
162 recruitment of CAF-1 to the replisome. Inhibition of the PIP box downstream of the KER (Figure  
163 1a) by substitution of Cac1 residues F233A/F234A (mPIP) ([Zhang et al., 2016](#)) did not result in  
164 an increase in sensitivity to CPT and Zeocin when in combination with  $\Delta$ KER ( $\Delta$ KER+mPIP)  
165 (Figure 1n, Table 1 and Figure 1-figure supplement 2e). This is in contrast to mWHD+mPIP cells  
166 (Table 1 and Figure 1-figure supplement 2e) where WHD and the PIP box cooperate in their  
167 recruitment function ([Zhang et al., 2016](#)). These results suggest a role of the KER independent of  
168 recruitment of CAF-1 to the replisome via the PIP box.

169 CAF-1 function can influence cellular gene expression profiles, presumably by the  
170 deposition of nascent nucleosomes that promote the reestablishment of chromatin landscapes  
171 post-DNA replication ([Ramachandran and Henikoff, 2016](#)). To investigate the role of the KER in  
172 this process, we used strains with a Green Fluorescent Protein (GFP) reporter in the *HMR* mating-  
173 type locus of budding yeast. In normal conditions the *HMR* locus is silenced but defects in the  
174 chromatin result in expression of GFP with measurable fluorescence by flow cytometry ([Huang et](#)  
175 [al., 2005](#); [Laney and Hochstrasser, 2003](#)) (Figure 1o and Figure 1-figure supplement 2f).

176 Functionality of this reporter assay was confirmed by deletion of *SIR2* (*sir2* $\Delta$ ), a subunit of  
177 the silent information regulator (SIR) complex required for the establishment of silencing of the  
178 *HMR* locus ([Rine and Herskowitz, 1987](#)). Almost 100% of *sir2* $\Delta$  cells exhibited GFP fluorescence  
179 (Figure 1o). Consistent with the CPT and Zeocin sensitivity assays, we found that  $\Delta$ KER, mWHD,  
180 and mPIP cells had low expression of GFP. As previously reported, a high percentage of

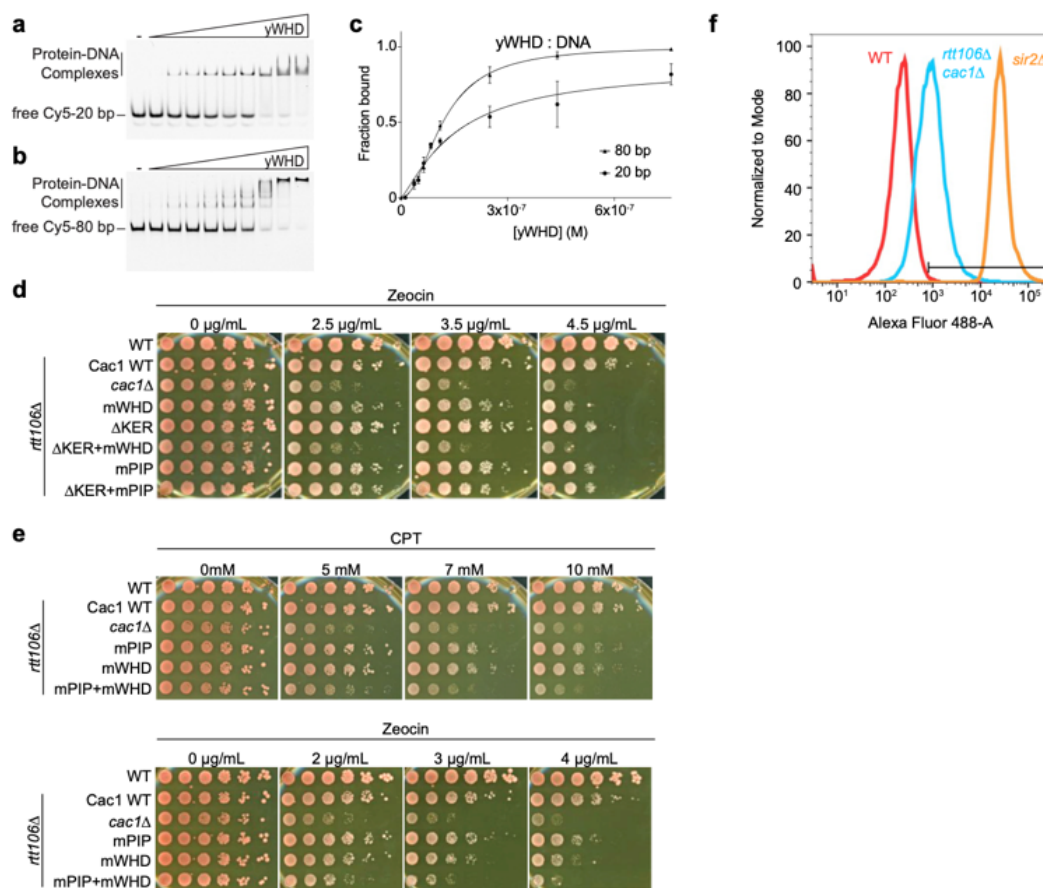

181  
182  
183  
184  
185  
186  
187  
188  
189  
190  
191

**Figure 1-figure supplement 2. CAF-1 DNA binding analysis and *in vivo* assays.** **a,b**, Representative images of EMSAs with 2 nM of the indicated Cy5-labeled DNA and yWHD over a range of protein concentrations of 12–760 nM. **c**, Quantitative analyses of EMSAs of yWHD with Cy5-labeled DNA. Data from at least three independent experiments were plotted as the mean and standard deviation (error bars). The binding curves were fitted using Eqn. 1. **d,e**, Yeast spot assay with 5-fold serial dilutions of cultures of the indicated strains; grown under in the presence of CPT, or Zeocin at the specified concentrations. **f**, Representative flow cytometry histograms of cultures of the indicated yeast strains sorted with the Alexa Fluor 488-4 channel that detects GFP signal. See also Figure 1 - figure supplement 2 - Source data 1.

192 **Table 1.** Relative sensitivity to CPT and Zeocin of yeast cells harboring CAF-1 mutations in a  
 193 *rtt106Δ* background.  
 194  
 195

|                | CPT sensitivity | Zeocin sensitivity |
|----------------|-----------------|--------------------|
| Cac1 WT        | +               | +                  |
| <i>cac1Δ</i>   | +++++           | +++++              |
| ΔKER           | ++              | ++                 |
| mWHD           | +++             | +++                |
| mPIP           | +++             | ++                 |
| mWHD+mPIP      | +++++           | +++++              |
| ΔKER+mWHD      | +++++           | +++++              |
| ΔKER+mPIP      | +++             | ++                 |
| Δmiddle-A      | ++              | ++                 |
| Δmiddle-A+mWHD | +++++           | +++++              |
| 2xKER          | ++              | +++                |
| 2xKER+mWHD     | ++              | +++                |
| Δ145-149       | +               | +                  |
| Δ145-149+mWHD  | ++++            | +++++              |
| Δ225-226       | ++              | ++                 |
| Δ225-226+mWHD  | +++++           | +++++              |
| Δ225-226+mPIP  | +++             | +++                |
| KER::hKER      | +               | ++                 |
| KER::hKER+mWHD | ++++            | +++++              |

196 *cac1Δrtt106Δ* cells have increased GFP expression and mPIP+mWHD cells have a comparable  
197 level of GFP expression, suggesting a near-total loss of CAF-1 function ([Zhang et al., 2016](#)). No  
198 increase in GFP expression is seen in response to combined  $\Delta$ KER+mPIP cells when compared  
199 to mPIP alone (Figure 1o). In contrast,  $\Delta$ KER+mWHD cells had GFP expression, similar to  
200 *cac1Δrtt106Δ* cells, suggesting a near-complete loss of CAF-1 function. Together, these results  
201 suggest that yCAF-1 requires the coordinated action of the KER and WHD to prevent DNA  
202 damage sensitivity and establish silencing of repressed genes *in vivo*. Since both the KER and  
203 the WHD bind to DNA, they might have overlapping yet complementary functions in targeting or  
204 aligning CAF-1 correctly to the DNA during nucleosome assembly.

205

#### 206 **The KER is a first-in-class single alpha helix (SAH) DNA-binding domain.**

207 To gain insight into how the KER region binds to DNA and facilitates CAF-1 function *in vivo*,  
208 we determined the structure of the yKER at 2.81 Å resolution. Crystals grown of a maltose binding  
209 protein (MBP)-KER fusion construct (Figure 2a, Figure 2-figure supplement 1a,b and  
210 Supplementary Table 4) contained four copies of the MBP-yKER per asymmetric unit. The yKER  
211 extended from the MBP as an almost entirely solvent exposed continuous alpha helix (Figure 2-  
212 figure supplement. 1b). The longest yKER helix modeled (PDB 8DEI; molecule A) is 128 Å long  
213 with 23 helical turns, encompassing Cac1 amino acids 136–221 (Figure 2a). Superposition of the  
214 four KER copies gives root mean square deviation (R.M.S.D.) values between 0.66 and 2.2 Å, as  
215 the helices have a marked curvature in the region of aa 165-190 and larger deviations at the  
216 termini (Figure 2-figure supplement 1c). In the structure, we saw no evidence of interactions  
217 between yKER helices or formation of any tertiary structure, consistent with the definition of a  
218 single alpha helix (SAH) domain ([Wolny et al., 2017](#)). Inspection of the sequence of the yKER  
219 reveals a pattern of opposite-charged residues, lysine/arginine and glutamic acid, that are 3 or 4  
220 residues apart (Figure 2b), capable of forming an ion pair network. Such a network confers

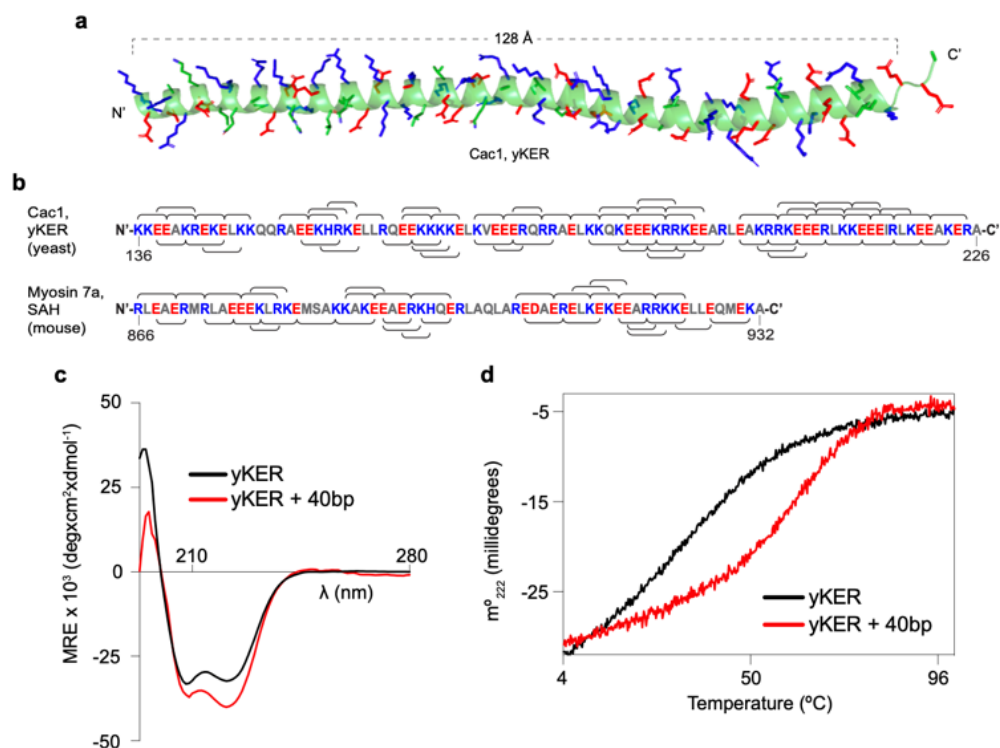

221  
222  
223  
224  
225  
226  
227  
228  
229  
230  
231

**Figure 2. The yKER is a single alpha-helix (SAH) domain that forms a stable complex with DNA.** **a**, Ribbon representation of the X-ray crystal structure of yCAF-1 KER region. Cac1 residues 136–222 are shown with side chains of residues Lys, Arg, and His colored in blue and Glu in red. **b**, Schematic diagram of the indicated SAH sequences with positively charged residues Arg, Lys, and His, colored in blue; and negatively charged residue Glu and Asp colored in red. The brackets along the sequence represent predicted interhelical *i*, *i*+4 or *i*, *i*+3 ion pairs. **c**, Overlap of circular dichroism spectra of yKER alone and in the presence of 40 bp DNA. DNA signal was subtracted from the yKER + 40 bp DNA sample to observe only changes in the protein component. **d**, Thermal denaturation monitored by circular dichroism at 222 nm ( $m^{o}_{222}$ ) of yKER alone and in the presence of 40 bp DNA. See also Figure 2 - Source data 1.

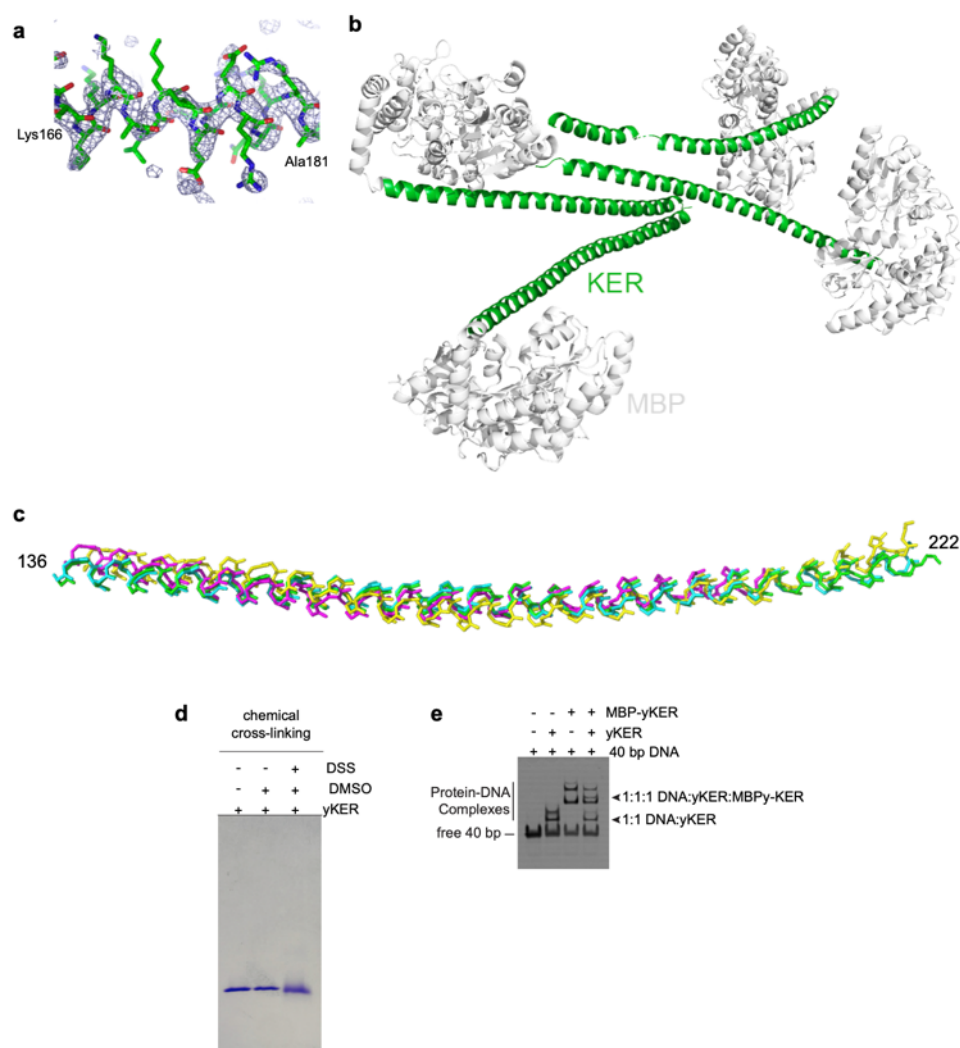

232  
 233 **Figure 2-figure supplement 1. Analysis of the MBP-yKER crystal structure.** **a**, Diagram  
 234 showing electron density for a region of the yKER. The 2Fo-Fc composite omit map was  
 235 contoured at 1 sigma. **b**, Crystal packing diagram showing the arrangement of the four molecules  
 236 in the asymmetric unit. **c**, Diagram showing the superposition of the yKER domains from  
 237 molecules A-D, colored green, cyan, magenta, and yellow, respectively. **d**, SDS-PAGE stained  
 238 with Coomassie Blue showing chemical cross-linking of the yKER domain. The indicated lanes  
 239 include the untreated yKER, yKER incubated with the vehicle (DMSO) and yKER crosslinked with  
 240 disuccinimidyl suberate (DSS). The diffuse band indicates intra-peptide crosslinking. **e**,  
 241 Representative image of a heterogenous subunit EMSA experiment with 40 bp DNA, the yKER  
 242 and MBP-yKER. The proteins and DNA were mixed at a concentration of 900 nM in all reactions.  
 243 The observed signal corresponds to Cy5-40 bp DNA that was spiked in all reactions to facilitate  
 244 visualization. The interpreted composition of the protein-DNA complexes observed is indicated.  
 245 See also Figure 2 - figure supplement 1 - Source data 1.

246 stability to the helix so that SAH domains can be completely solvent exposed in solution (Batchelor  
247 et al., 2019; Sivaramakrishnan et al., 2008; Wolny et al., 2017; Swanson and Sivaramakrishnan,  
248 2014); such as in the well characterized Myosin7a SAH (Barnes et al., 2019). The circular  
249 dichroism (CD) spectrum of the KER showed characteristics of only alpha helical secondary  
250 structure, including the positive absorption band at 195 nm and two negative bands at 208 and  
251 222 nm (Figure 2c), validating in solution the structure of the KER observed in the crystal.  
252 Interestingly, binding to DNA increased the alpha helical content of the yKER (Figure 2c) without  
253 changes in the CD signal from the DNA (Figure 2-figure supplement. 2a), suggesting that no  
254 major DNA structural changes occur.

255 Fundamental to the definition of SAH domains is that they exhibit non-cooperative  
256 denaturation transitions due to a lack of tertiary structure (Wolny et al., 2017; Wolny et al., 2014;  
257 Süveges et al., 2009). This behavior is also observed in the thermal denaturation monitored by  
258 CD at 222 nm of the yKER (Figure 2d). Furthermore, chemical crosslinking with disuccinimidyl  
259 suberate (DSS) showed no evidence of KER multimers (Figure 2-figure supplement. 1d),  
260 supporting the conclusion that the yKER does not form a tertiary structure. In contrast, in the  
261 presence of 40 bp DNA, the thermal denaturation of the yKER showed an increase of 10 °C in  
262 the melting temperature and a two-state cooperative unfolding transition (Figure 2d), which  
263 demonstrates the ability of the yKER to form a stably folded protein-DNA complex. The  
264 monomeric state of the yKER also suggests that the additional yKER-DNA complexes observed  
265 in the EMSAs (Figure 1f-i) are due to the addition of yKER monomers to the same molecule of  
266 DNA. This was substantiated through use of a heterogenous subunit EMSA (Hope and Struhl,  
267 1987; Gangelhoff et al., 2009) with the yKER, MBP-yKER and a combination of the two proteins.  
268 The mixed-protein subunit:DNA complexes (Figure 2-figure supplement 1e) can only be explained  
269 if the KER forms no obligate oligomers on the DNA. Rather, multiple monomers of yKER are  
270 recruited to the same molecule of DNA, creating the multiplicity of bands in the EMSA. Finally,  
271 DNA binding has not been reported for other SAH domains even though they have a similar amino

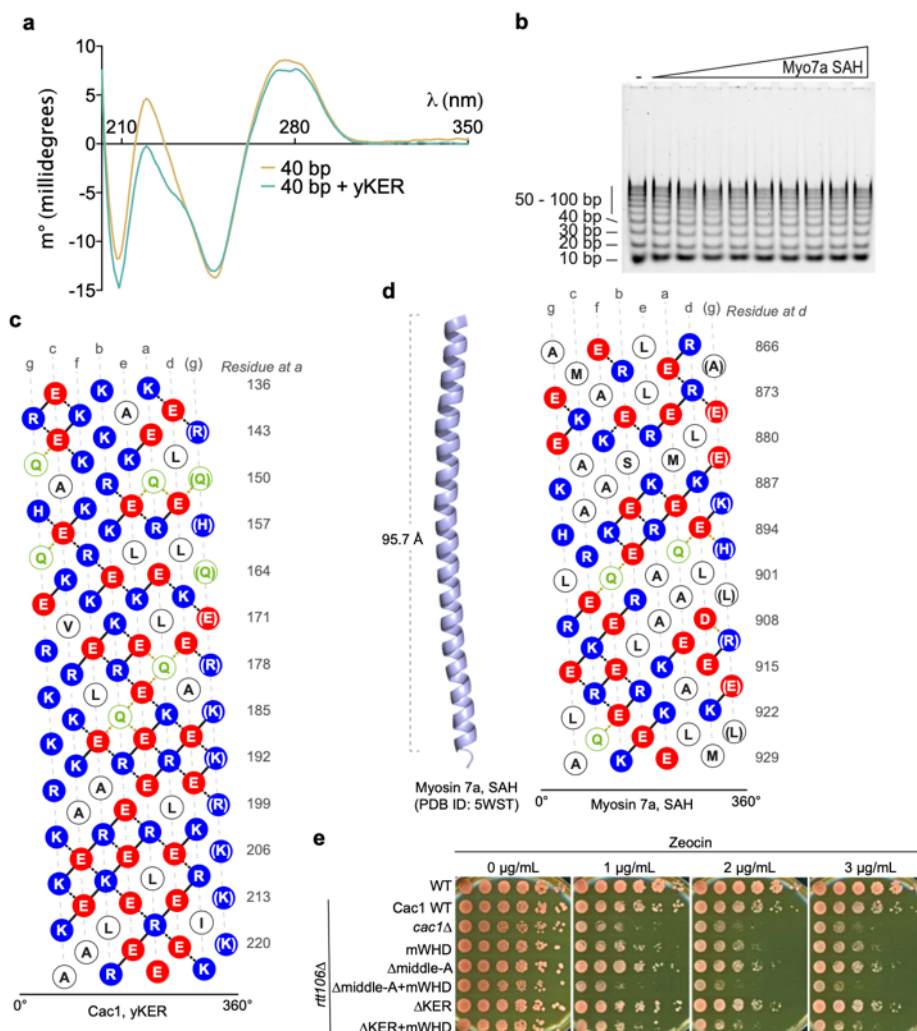

272

273 **Figure 2-figure supplement 2. DNA binding properties of the yKER.** **a**, Graph of circular  
 274 dichroism spectra of 40 bp DNA alone and in the presence of yKER. The yKER spectrum was  
 275 subtracted from the 40 bp + yKER sample to observe only changes in the DNA component. **b**,  
 276 Representative image of a SYBR green-stained EMSA experiment for Myosin 7a SAH with a 10  
 277 bp DNA ladder. 500 nM of total DNA ladder was incubated with a range of 64 nM-1 μM  
 278 concentrations of protein. **c**, Helical net diagram of yKER. In this representation, the SAH structure  
 279 has been split along a helical track and unwound so it can be displayed in 2D. Amino acids colored  
 280 in red are negatively charged, blue are positively charged, green is glutamine and white are other  
 281 polar or hydrophobic. Lines connecting colored residues represent predicted ion pair interactions  
 282 based on strength: solid lines, strong; black dashed lines, medium; yellow dashed lines, weak. **d**,  
 283 Crystal structure of the Myosin 7a SAH along with its helical net representation as in **c**. **e**, Yeast  
 284 spot assay with 5-fold serial dilutions of cultures of the indicated strains; grown in the presence of  
 285 Zeocin at the specified concentrations. See also Figure 2 - figure supplement 2 - Source data 1.



286 acid composition (Figure 2b and Figure 2-figure supplement 2c,d). Examination of a purified  
287 Myosin7a SAH ([Barnes et al., 2019](#)) (Figure 1-figure supplement 1b and Figure 2-figure  
288 supplement 2b) using EMSA detected no DNA binding, indicating that the DNA binding properties  
289 of the yKER are not a general feature of SAH domains.

290

291 **The yKER requires both the alpha helical structure and positively charged residues for**  
292 **DNA binding and yCAF-1 function *in vivo*.**

293 As the yKER is a novel DNA-binding SAH, it was important to define which sequence  
294 features are responsible for the DNA binding functionality. We noticed that the yKER SAH is  
295 particularly enriched in positively charged residues, unlike the Myosin7a SAH (Figure 2-figure  
296 supplement 2c,d). These residues are biased towards one face of the yKER helix and confer a  
297 net positive charge along most of the length of the yKER, which is concentrated toward the N-  
298 terminal and middle regions (Figure 3a). To map the DNA binding region, we designed and  
299 purified five truncated versions of the yKER (Figure 3a and Figure 1-figure supplement 1b). These  
300 proteins exhibited different alpha helical content, which was markedly greater for the constructs  
301 containing C-terminal regions (Figure 3b). However, only the middle-A protein (residues 155-204)  
302 exhibited strong DNA binding similar to the intact KER (Figure 3a,c-g), whereas the N-half and  
303 middle-B constructs, which partially overlap with middle-A, did not bind well to DNA (Figure 3e,g).  
304 Although regions of the yKER outside of the middle-A region likely contribute to KER function, the  
305 middle-A region is required for DNA binding due to both the positively charged residues and alpha  
306 helical structure. Notably, deletion of the middle-A residues from yCAF-1 (yCAF1  $\Delta$ middle-A)  
307 abrogates binding of yCAF-1 to DNA (Figure 3h), confirming the importance of this region.  
308 Interestingly, we also observed that yCAF1  $\Delta$ middle-A binds to DNA worse than the deletion of  
309 the KER (yCAF1  $\Delta$ KER) (Figure 3h), suggesting that residual SAH structure might not support  
310 the correct organization or architecture of yCAF-1 in a manner that hinders the activity of the WHD.  
311 In the context of CAF-1, a substitution of the KER for the Myosin 7a SAH (KER::Myo7a) in

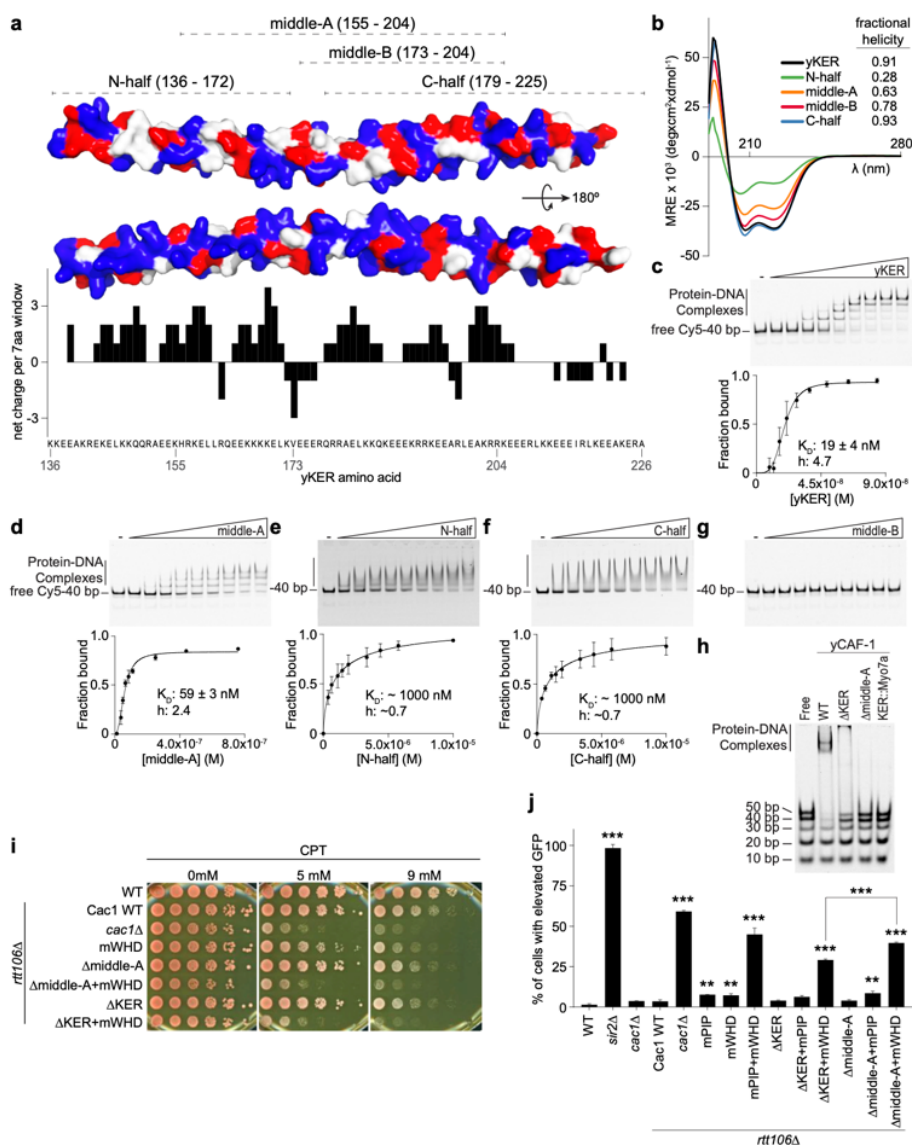

312

313 **Figure 3. The yKER middle region is required for DNA binding and yCAF-1 function *in vivo*.** **a**, Surface  
 314 representation of two views of the yCAF-1 KER structure with basic residues colored in blue, acidic in red,  
 315 and polar or hydrophobic in grey. The dashed lines at the top illustrate the yKER truncations under  
 316 investigation. The bar graph represents the net charge calculated for a sliding window of 7 amino acids  
 317 along the yKER sequence. The resulting net charge was assigned to the fourth residue in the window. **b**,  
 318 Overlay of circular dichroism spectra of the yKER constructs indicated in **a**. **c-g**, Representative images of  
 319 EMSA experiments and binding curves for the yKER constructs indicated in **a**. Cy5-40 bp DNA (either 2 or  
 320 2.5 nM) binding was observed over a range of protein concentrations of 9–84 nM for the yKER, 12–760 nM  
 321 for the middle-A, 0.37–1 μM for N-half, C-half, and middle-B.  $K_D$  and  $h$  values were calculated from binding  
 322 curves fitted with Eqn. 1 and were plotted as the mean of at least three independent experiments. **h**,  
 323 Representative image of an EMSA showing the binding of a fixed concentration (250 nM) of yCAF-1, yCAF-  
 324 1 ΔKER, yCAF-1 Δmiddle-A, and yCAF-1 KER::Myo7aSAH proteins binding to a set of different length of  
 325 Cy5-labeled DNA fragments at 1 nM each. **i**, Yeast spot assay with 5-fold serial dilutions of cultures of the  
 326 indicated strains; grown in the presence of CPT at the specified concentrations. **j**, Bar graph indicating the  
 327 percentage of cells exhibiting elevated GFP levels from yeast cultures of the indicated strains sorted by  
 328 flow cytometry. Error bars indicate the standard deviation of the calculated values from three measurements.  
 329 Statistical significance was calculated by Student's *t*-test where \* =  $p < 0.05$ , \*\* =  $p < 0.01$ , and \*\*\* =  $p < 0.001$   
 330 relative to Cac1 WT cells. See also Figure 3 - Source data 1.

331 yCAF-1, also abolished DNA binding (Figure 3h). *In vivo*,  $\Delta$ middle-A yeast behave like the  $\Delta$ KER  
332 cells, exhibiting similar sensitivity to CPT and Zeocin, and even higher GFP expression levels in  
333 the silencing assay when in combination with mWHD (Figure 3i,j, Table 1, and Figure 2-figure  
334 supplement 2e). Taken together, we conclude that a specific region within the KER domain  
335 (middle-A) simultaneously forms an alpha helix and engages with DNA to drive DNA binding and  
336 the biological functions of yCAF-1.

337

### 338 **The KER confers the selectivity of CAF-1 for tetrasome-length DNA.**

339 Consistent with previous results ([Sauer et al., 2017](#)), and in Figure 1, yCAF-1 was found  
340 to have the highest binding affinity for DNA fragments that are at least 40 bp in length, which  
341 suggests a DNA-length selective property of CAF-1 that is driven by the KER. To test this  
342 hypothesis, we developed a novel EMSA approach, which uses equimolar concentrations of Cy5-  
343 labeled DNA fragments spanning 10–50 bp in length (Cy5-DNA ladder) to detect the DNA length  
344 preferences of CAF-1 under competition conditions between different lengths of DNA (Figure 4a-  
345 e). The free DNA signal for each fragment in the Cy5-DNA ladder was quantitated and plotted as  
346 a function of protein concentration. Subjecting yCAF-1 to this assay resulted in a DNA-length  
347 selective binding behavior, as shown by the preferential depletion of the 50 and 40 bp DNA  
348 fragments from the free DNA at lower concentrations of yCAF-1 compared to the 20 and 30 bp  
349 fragments (Figure 4a), while 10 bp remained unchanged. In order to visualize these differences  
350 in competition, we plotted the protein concentration required to give half-maximal depletion as a  
351 means to compare different proteins and different DNA lengths in the assay (Figure 4f). We  
352 observed a threshold effect that yCAF-1 prefers to bind to DNA of at least 40 bp in length (Figure  
353 4f). Similarly, the yKER bound to the Cy5-DNA ladder in a DNA-length dependent manner.  
354 However, the yKER substantially depleted 30 and 20 bp fragments from the free DNA at lower  
355 concentrations (Figure 4b), revealing a very slight threshold effect compared to yCAF1. In contrast,  
356 the yWHD exhibited virtually no DNA-length selective binding, except that like the KER, the

357

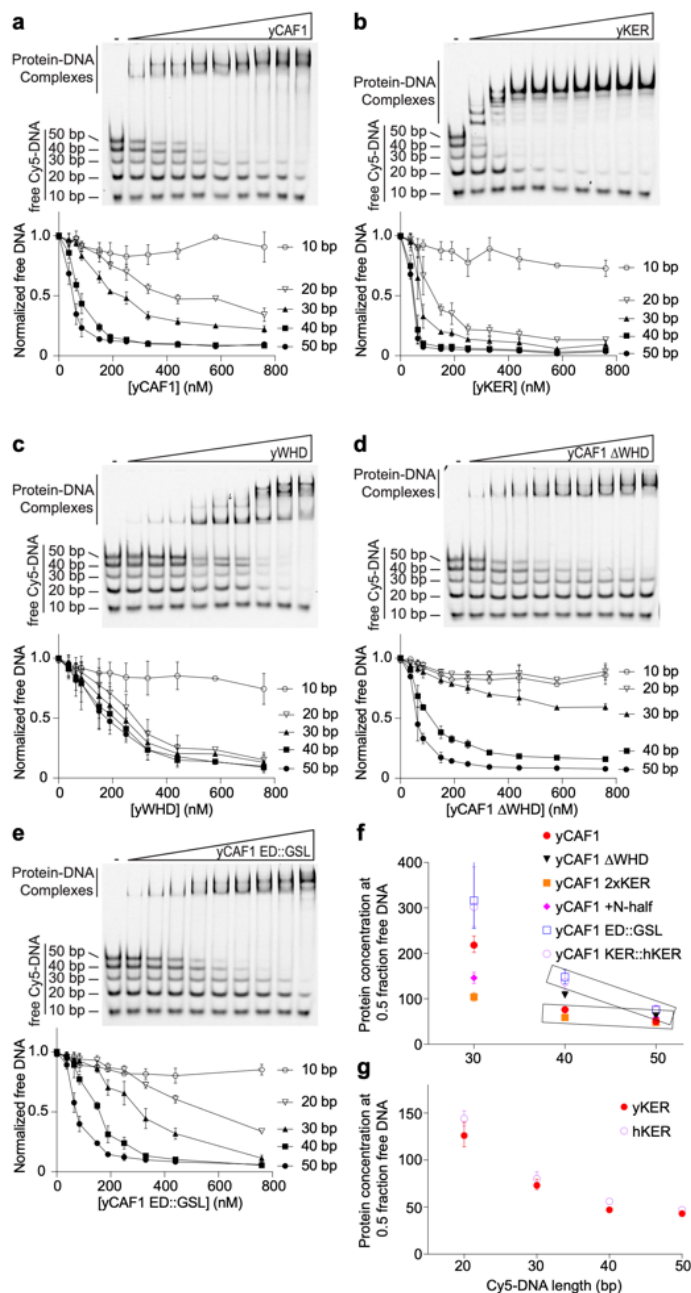

358

359 **Figure 4. The yKER confers DNA-length selectivity to yCAF-1.** a-e, Representative images of  
 360 EMSAs showing DNA binding of yCAF-1, yKER, yWHD, yCAF-1  $\Delta$ WHD, or yCAF-1 ED::GSL  
 361 where each Cy5-labeled DNA fragment is at 1 nM concentration and the range of protein  
 362 concentration was 37–760 nM for all constructs. Below each gel image, the graph shows the  
 363 quantitation of free (unbound) DNA signal for each Cy5-labeled DNA as a function of protein  
 364 concentration. The data are plotted as the mean and standard deviation from at least three  
 365 measurements. f,g, Plots representing the protein concentration required to achieve 50%  
 366 depletion of the individual DNA fragments from the Cy5-DNA ladder for the indicated yCAF-1  
 367 constructs (f) or CAF-1 domains (g). See also Figure 4 - Source data 1.

368 shortest 10 bp DNA was bound poorly (Figure 4c). yCAF-1 with the WHD deleted (Cac1 amino  
369 acids 520–606) (yCAF1  $\Delta$ WHD) did not bind well to the 10-30 bp fragments, but did have a slight  
370 preference for the 50 bp over the 40 bp DNA (compare Figure 4a and d). Relevant to this  
371 observation, previous studies revealed that in a truncated form of CAF-1, the WHD interacts with  
372 the ED region (Figure 1a) and that H3/H4 dimer binding to the ED was needed to displace the  
373 WHD and free it to bind to DNA ([Mattioli et al., 2017b](#)). This ‘autoinhibited state’ of the WHD can  
374 also be released through substitution of Cac1 residues 397–431 in the ED region by a  
375 glycine/serine/leucine linker (ED::GSL), which decreases the affinity of the WHD for the ED and  
376 allows the WHD to bind DNA in a histone-free manner ([Mattioli et al., 2017b](#)). Therefore, we  
377 recapitulated the ED::GSL substitution in the context of full-length yCAF-1 (yCAF1 ED::GSL)  
378 (Figure 4e) and subjected it to the Cy5-DNA ladder assay. We found that yCAF1 ED::GSL showed  
379 a slight preference for the 50 bp DNA compared to the 40 bp (Figure 4e,f), suggesting that the  
380 uninhibited WHD contributes further to the length of DNA recognized by CAF-1. Together, these  
381 results demonstrate that the KER, but not the WHD, equips yCAF-1 with a DNA-length selectivity  
382 function that favors binding to DNA fragments that are at least 40 bp in length. Also, the presence  
383 of the WHD permits yCAF1 binding to 20 and 30 bp DNA, suggesting it has either a direct or  
384 indirect contribution to DNA binding of yCAF-1; and that there is a further contribution to the length  
385 threshold in the state where the WD is released from the ED.

386

387 **The length of the KER alters CAF-1 DNA length recognition and modulates yCAF-1**  
388 **functions *in vivo*.**

389 The difference in DNA length selectivity between the KER in isolation compared to yCAF-1  
390 (Figure 1l and Figure 4a,b) suggests that the context of the KER within the CAF-1 complex directs  
391 preferential binding to the longer DNA fragments. To investigate this, we made perturbations to  
392 the length of the KER in yCAF1 and evaluated the effects on DNA binding and function *in vivo*.  
393 We expressed and purified a yCAF-1 mutant that contains two KER domains in tandem (yCAF1

394

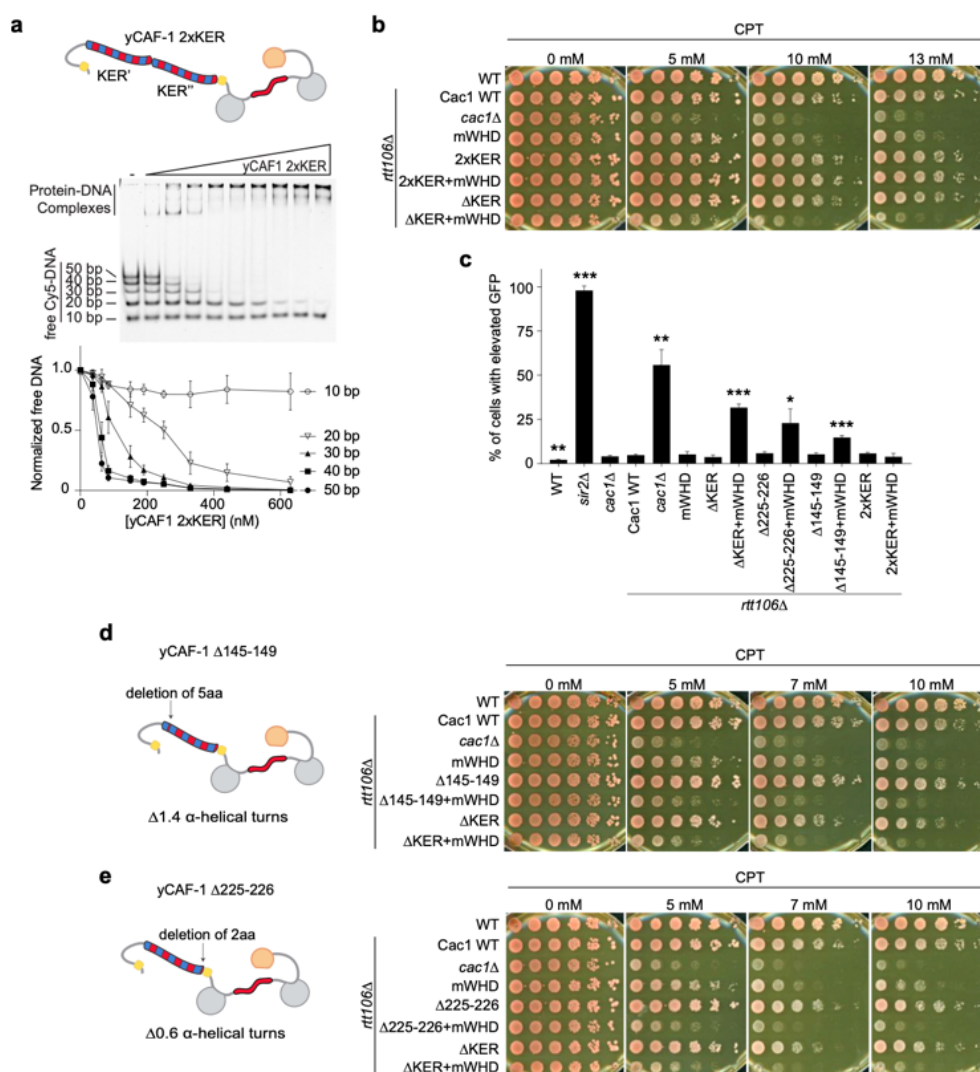

395

396 **Figure 5. The length and the phase of the yKER SAH modulates yCAF-1 functions *in vivo*.**  
 397 **a**, Cartoon representing the yCAF-1 2xKER construct along with a representative image of an  
 398 EMSA of showing binding to a set of Cy5-labeled DNA fragments (1 nM each) with a range of  
 399 protein concentrations from 37 to 630 nM. Below the EMSA image, the free (unbound) DNA signal  
 400 for each Cy5-labeled DNA is plotted as a function of the protein concentration. The error bars are  
 401 the standard deviation from at least three measurements. **b**, Yeast spot assays with 5-fold serial  
 402 dilutions of cultures of the indicated strains; grown in the presence of CPT at the specified  
 403 concentrations. **c**, Bar graph indicating the percentage of cells exhibiting elevated GFP levels  
 404 from yeast cultures of the indicated strains sorted by flow cytometry. Error bars indicate the  
 405 standard deviation of the calculated values from three measurements. Statistical significance was  
 406 calculated by Student's *t*-test where \* =  $p < 0.05$ , \*\* =  $p < 0.01$ , and \*\*\* =  $p < 0.001$  relative to Cac1  
 407 WT cells. **d, e**, Yeast spot assays as in **b**, where cartoons on the left represent the shift of alpha-  
 408 helical turns for the indicated KER deletions in yCAF-1. See also Figure 5 - Source data 1.

409

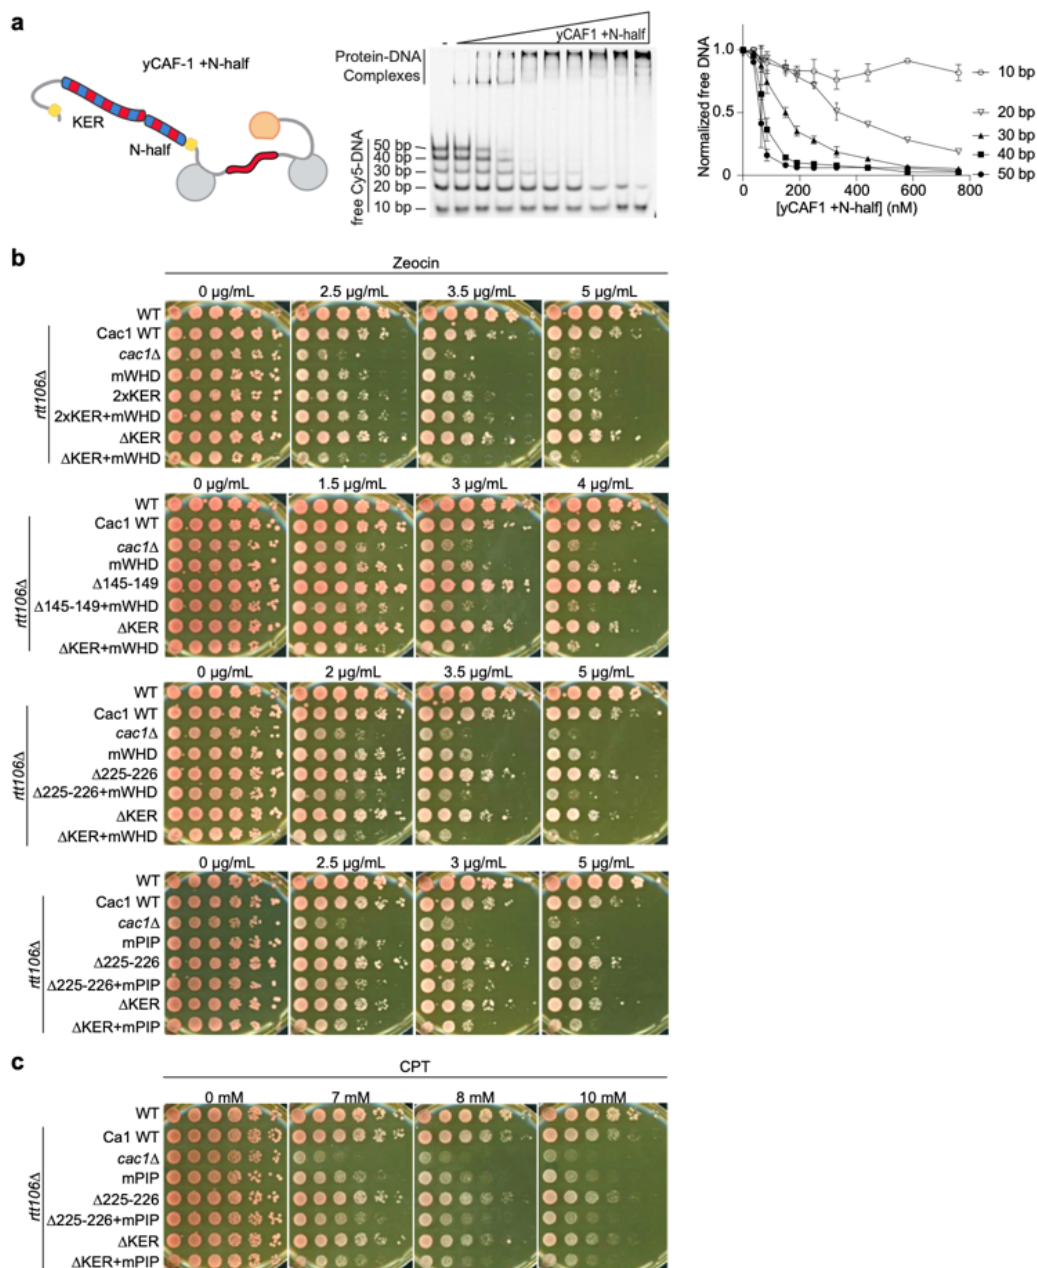

410

411

412 **Figure 5-figure supplement 1. Analysis of the yKER length.** **a**, Representative image of and  
 413 EMSA experiment of yCAF-1 +N-half, where each Cy5-labeled DNA fragment was at 1 nM  
 414 concentration and the range of protein concentration was 37–760 nM. The graph shows the  
 415 quantitation of free (unbound) DNA signal for each Cy5-labeled DNA as a function of protein  
 416 concentration. **b,c**, Yeast spot assay with 5-fold serial dilutions of cultures of the indicated strains;  
 417 grown in the presence of Zeocin or CPT at the specified concentrations. See also Figure 5 - figure  
 418 supplement 1 - Source data 1.

419 2xKER) by introducing an additional yKER (amino acids 136–225) in the Cac1 subunit  
420 immediately after the endogenous 225 residue (Figure 1-figure supplement 1a). Examination of  
421 yCAF1 2xKER in our Cy5-DNA ladder experiment showed that unexpectedly the additional KER  
422 did not alter the DNA-length threshold of 40 bp (Figure 5a, 4f). A similar result was observed with  
423 a yCAF-1 mutant that contains an additional KER N-terminal half of the KER (Cac1 residues 136–  
424 172) added after the endogenous 225 residue of Cac1 (yCAF1 +N-half) (Figure 4f and Figure 5-  
425 figure supplement 1a). *In vivo*, yCAF1 2xKER (2xKER) exhibited mild sensitivity to CPT (Figure  
426 5b) and Zeocin (Figure 5-figure supplement 1b) to a similar extent as seen for  $\Delta$ KER cells.  
427 Surprisingly, 2xKER in combination with inhibition of the WHD (2xKER+mWHD) did not have an  
428 additive effect unlike  $\Delta$ KER in both CPT and Zeocin conditions (Figure 5b and Figure 5-figure  
429 supplement. 1b). Likewise, the 2xKER mutant caused no significant loss of silencing in yeast and  
430 it did not increase this effect when in combination with mWHD (Figure 5c). Together, addition of  
431 a KER sequence did not result in substantial differences in the DNA-length selectivity of yCAF-1,  
432 and did not impact the ability to overcome DNA damage and maintain gene silencing *in vivo*.

433 We then explored whether truncations of the KER helix have an effect in CAF-1 function *in*  
434 *vivo*. We made a short deletion within the basic region of the KER ( $\Delta$ 145-149) (Figure 3a), which  
435 removes 5 amino acid residues, shortens the helix by 1.4 turns and changes the phase of the  
436 helix. The deletion is not in the main DNA binding region of the KER (Figure 3) and is not expected  
437 to alter the DNA binding function of the KER. Interestingly,  $\Delta$ 145-149 cells behave like  $\Delta$ KER cells,  
438 exhibiting similar sensitivity to CPT and Zeocin, as well as high GFP expression levels in our  
439 silencing assay when in combination with mWHD (Figure 5c,d, Table 1, and Figure 5-figure  
440 supplement. 1b). Strikingly, identical results were found when only the deletion of the last two C  
441 terminal residues 225-226 ( $\Delta$ 225-226) of the KER region in the Cac1 subunit were made (Figure  
442 5e,c, Table 1 and Figure 5-figure supplement. 1b,c). We conclude that a very specific length of  
443 the yKER is critical to overcome DNA damage and maintain gene silencing *in vivo*.

444



445 **The longer human KER alters DNA-length dependent binding and does not substitute for**  
446 **the yKER in yCAF-1 *in vivo*.**

447 Our results from altering the length of the KER of CAF-1 in yeast revealed that CAF-1  
448 function is highly sensitive to the length or phase of the helix, where the deletion of only two  
449 residues was sufficient to impair yCAF-1 function similar to a complete deletion of the KER (Figure  
450 5). The length of the KER regions in other species differ. In the human homologue CHAF1A, the  
451 KER has a similar distribution of basic residues, but it is at least 20 residues longer than the yKER  
452 (Figure 6a). To address the hypothesis that the longer hKER might have different DNA binding  
453 properties than the yKER, we expressed and purified the hKER (CHAF1A residues 331–441) and  
454 using CD found that it has high alpha helical content, and exhibits non-cooperative unfolding as  
455 expected for a SAH (Figure 1-figure supplement 1b and Figure 6-figure supplement 1a-c).  
456 Subjecting the hKER to our Cy5-DNA ladder assay resulted in identical DNA-length selectivity  
457 behavior to the yKER (Figure 6b compared to 4b). However, substitution of the yKER for the  
458 hKER in yCAF-1(yCAF1 KER::hKER) (Figure 1-figure supplement 1a) slightly altered the DNA-  
459 length selectivity function of yCAF-1, as seen by the slight difference between the depletion of the  
460 50 bp DNA fragments relative to the shorter DNA in our Cy5-DNA ladder assay (Figure 6c  
461 compared to 4a). This difference is largely due to the decreased competitiveness of the 30 bp  
462 and 40 bp DNA compared to the 50 bp DNA (Figure 4f). This is only observed in the context of  
463 yCAF-1 but not in the isolated KERs (Figure 4g) and suggests that the longer hKER can alter the  
464 DNA-length preference of yCAF-1. Surprisingly, substitution of the KER for the hKER in yeast had  
465 a similar effect as the deletion of the KER, with similar sensitivity to CPT and Zeocin, as well as  
466 impaired chromatin silencing when in combination with mWHD (Figure 6d,e and Figure 6-figure  
467 supplement 1d). These results indicate that the hKER cannot substitute the yeast KER *in vivo*.  
468 Collectively, these results confirm the expected conservation of the overall SAH and DNA-binding  
469 characteristics of the KER from different species. Furthermore, and in agreement with our results

470 in Figure 5, the length of the KER alters the DNA length selectivity and plays a critical role in CAF-  
471 1 biological functions.

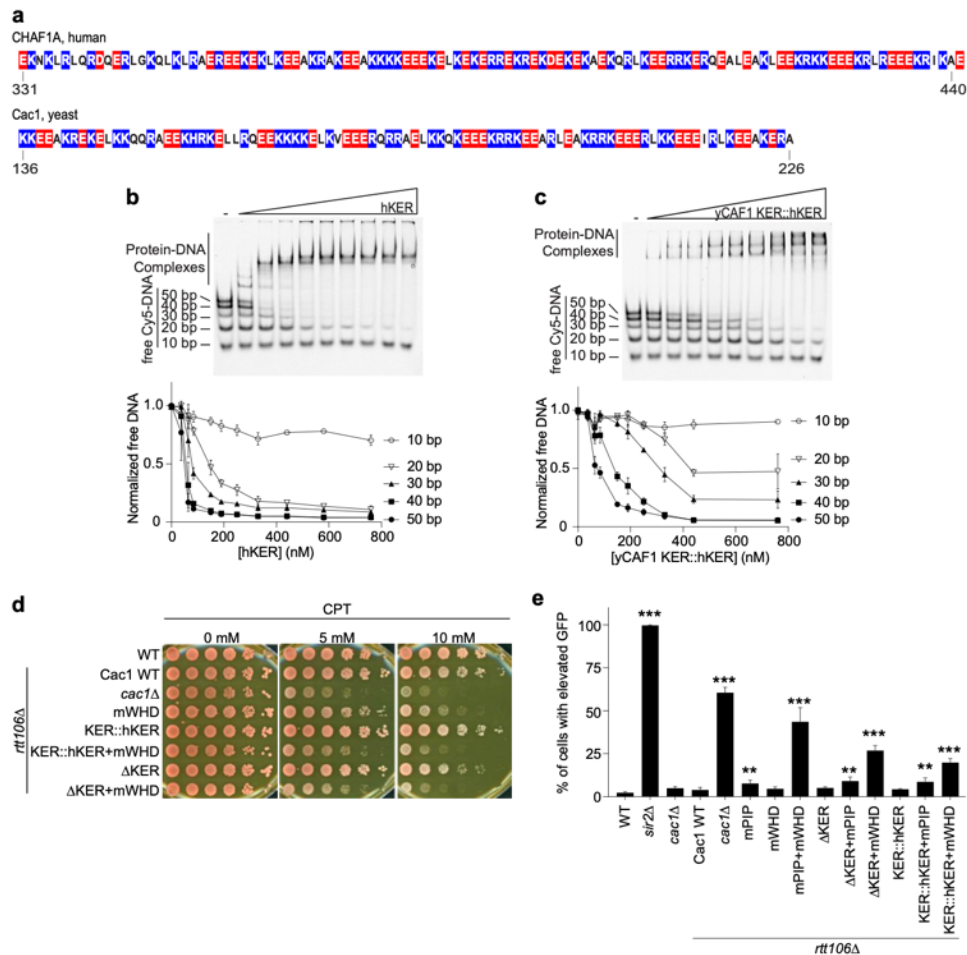

472  
 473 **Figure 6. CAF-1 DNA-length selectivity by the KER is species specific and its function is**  
 474 **not conserved *in vivo*.** **a**, Sequence of the KER region from human (CHAF1A, top) and yeast  
 475 (Cac1, bottom) homologues with positively charged residues Arg and Lys colored in blue, and  
 476 negatively charged residue Glu and Asp colored in red. **b,c**, Images of representative EMSAs of  
 477 human KER (hKER) and yCAF-1 KER::hKER, where each Cy5-labeled DNA fragment is at 1 nM  
 478 concentration and the range of protein concentration was 37–760 nM for both constructs. The  
 479 graphs below show the quantitation of free (unbound) DNA signal for each Cy5-labeled DNA as  
 480 a function of protein concentration. The data are plotted as the mean and standard deviation (error  
 481 bars) from at least three measurements. **d**, Yeast spot assay with 5-fold serial dilutions of cultures  
 482 of the indicated strains; grown in the presence of CPT at the specified concentrations. **e**, Bar  
 483 graph indicating the percentage of cells exhibiting elevated GFP levels from yeast cultures of the  
 484 indicated strains sorted by flow cytometry. Error bars indicate the standard deviation of the  
 485 calculated values from three measurements. Statistical significance was calculated by Student's  
 486 *t*-test where \* =  $p < 0.05$ , \*\* =  $p < 0.01$ , and \*\*\* =  $p < 0.001$  relative to Cac1 WT cells. See also Figure  
 487 6 - Source data 1.

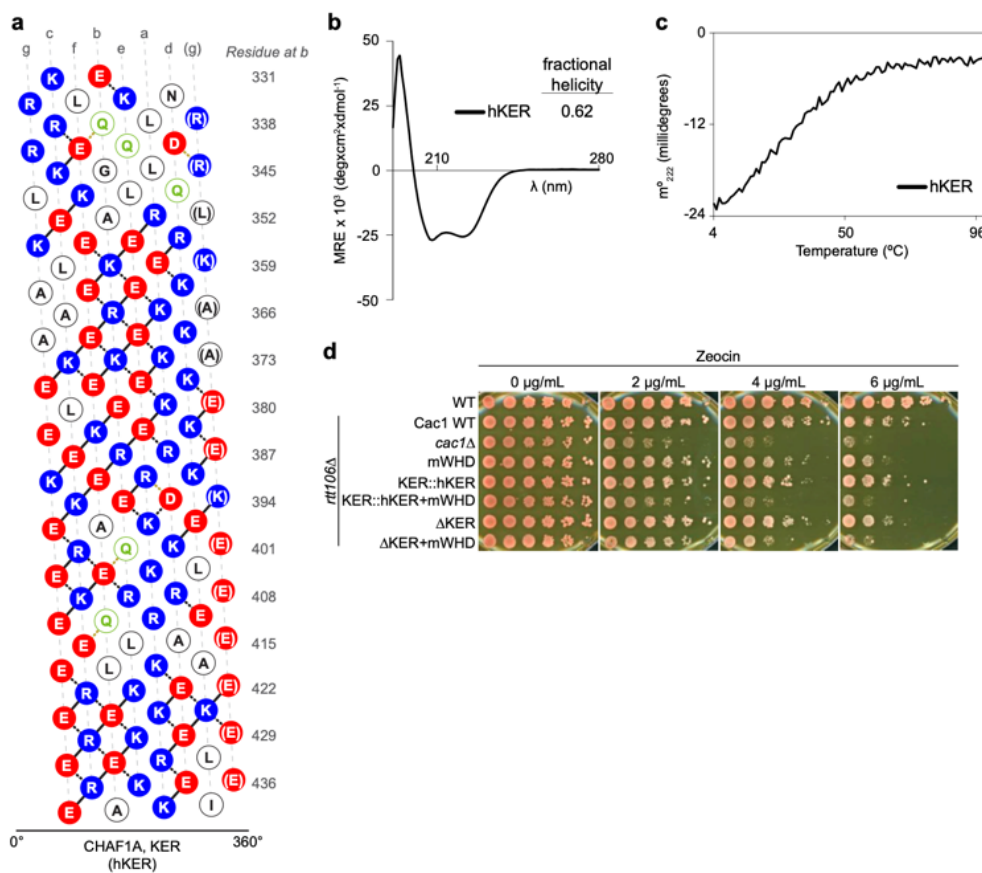

488

489 **Figure 6-figure supplement 1. Analysis of the substitution of the yKER with the hKER.** **a**,  
 490 Helical net diagram of the predicted SAH of the hKER (CHAF1A residues 331-441). In this  
 491 representation, the SAH structure has been split along a helical track and unwound so it can be  
 492 displayed in 2D, with coloration as in Extended Data Fig.4c. Lines connecting colored residues  
 493 represent predicted ion pair interactions based on strength: solid lines, strong; black dashed lines,  
 494 medium; yellow dashed lines, weak. **b**, Circular dichroism spectra of the hKER. **c**, Thermal  
 495 denaturation monitored by circular dichroism at 222 nm ( $m^0_{222}$ ) of the hKER. **d**, Yeast spot assay  
 496 with 5-fold serial dilutions of cultures of the indicated strains; grown in the presence of Zeocin at  
 497 the specified concentrations. See also Figure 6 - figure supplement 1 - Source data 1.

## 498 **Discussion**

499           The results presented here reveal the structure, activities and function of the KER domain  
500 in CAF-1. The KER is a long single alpha helix motif, with a distinct and unique pattern of basic  
501 residues. It binds DNA in a non-sequence-specific manner with a binding affinity in the nM range,  
502 establishing it as a first-in-class DNA binding domain, namely the 'SAH DBD'. Moreover, we found  
503 that in the context of yCAF-1, the KER is largely responsible for observed DNA length-preference  
504 of CAF-1 for tetrasome-length DNA ([Sauer et al., 2017](#)) and CAF-1 function *in vivo*.

505

### 506 **The KER SAH is a novel DNA binding motif.**

507           A defining feature of the SAH motif is the sequence pattern, which produces stabilizing  
508 electrostatic-interaction networks along the alpha helix. The KER SAH is the longest SAH  
509 described to date (Cac1 aa136-226; 90 aa) with the same general pattern of alternating basic and  
510 acidic amino acid residues as classic SAHs (Figure 2) ([Sivaramakrishnan et al., 2008](#); [Batchelor  
511 et al., 2019](#); [Dudola et al., 2017](#); [Gáspári et al., 2012](#)). However, the KER also has a stripe of  
512 basic residues along most of the helix, so far only noticeable in the KER SAH of CAF-1. Also  
513 unlike the canonical SAH motif, such as in Myosin 7a, the KER SAH binds to DNA. The  
514 appearance of multiple KER-DNA complexes in EMSA supports the role of the KER as a non-  
515 sequence-specific DNA binding domain ([Churchill et al., 1999](#); [Churchill et al., 1995](#)), consistent  
516 with the role of CAF-1 in depositing H3/H4 dimers throughout the genome. The KER of CAF-1 is  
517 the first SAH DNA binding domain (SAH-DBD) of its type within the larger group IV of "other alpha-  
518 helix DNA binding domains" ([Luscombe et al., 2000](#)). Thus, the discovery that the KER is a DNA  
519 binding SAH expands the repertoire of DNA binding domains.

520           The molecular mechanism of KER-DNA recognition requires both key positively charged  
521 residues and alpha helical conformation in the Cac1 middle-A section (Figure 3). Although CAF-  
522 1 prefers to bind to tetrasome-length DNA ([Luger et al., 1997](#); [Donham, Scorgie, and Churchill,  
523 2011](#)), the KER SAH is capable of binding to DNA as short as 20 bp, which is typical of many

524 DBDs. Many alpha helical DNA binding motifs, including leucine zippers and helix-loop-helix  
525 motifs, bind across the DNA within the major groove ([Luscombe et al., 2000](#); [Wolberger, 2021](#);  
526 [Churchill and Travers, 1991](#)). In contrast, long helices that lie parallel to the DNA exist in chromatin  
527 remodelers, such as the HSA and post-HSA domains in the actin related proteins (Arp4 and Arp8)  
528 of INO80 ([Knoll et al., 2018](#); [Baker et al., 2021](#)). However, these helices simultaneously interact  
529 extensively with other polypeptides in addition to the DNA ([Knoll et al., 2018](#); [Baker et al., 2021](#)).  
530 Whether the KER binds along the length of the DNA or engages only short stretches of the DNA  
531 in a similar manner to the other helical motifs is not clear. Our results are consistent with aspects  
532 of both models, as the middle region of the KER confers the ability to bind to DNA, and the  
533 positively charged amino acids along one face of the SAH DBD would be suitable for recognition  
534 along DNA.

535

### 536 **Function of the KER SAH-DBD in CAF-1 and implications for nucleosome assembly.**

537 The KER confers the preference of CAF-1 for tetrasome length DNA (Figure 1,4), in spite of  
538 the SAH-DBD recognition of shorter DNA lengths (Figure 4). Surprisingly, nearly all perturbations  
539 to the KER that we tested in yeast had reduced resistance to DNA damage and loss of gene  
540 silencing in combination with the mWHD (Figure 1,5,6 and Table 1), even a deletion of 2 residues,  
541 which rotated the helix approximately 200° relative to the DNA or other regions of CAF-1. Although  
542 doubling or extending the length of the yKER in yCAF-1 did not change the selectivity for 40 bp  
543 DNA, the 2xKER strain overall survived CPT and Zeocin induced DNA damage and maintained  
544 gene silencing in the absence of a functional WHD. This suggests that the second KER SAH  
545 functionally substitutes for the WHD *in vivo*. We also increased the DNA length preference of  
546 yCAF-1 to 50 bp by either derepressing the DNA binding function of the WHD, via the ED:GSL  
547 mutation or substituting the yKER with the hKER (Figure 4,6). Both of these mutations provide  
548 additional potential DNA binding interactions, but the hKER substitution also had a similar loss of  
549 function to the deletion of the KER *in vivo*. Thus, the context of the KER, including molecular

550 interactions, presence of a viable WHD and structural requirements imposed by the architecture  
551 of the CAF-1 complex, is critical for DNA length sensing and CAF-1 function *in vivo*.

552

553         How might a DNA length-sensing function of the KER in CAF-1 be relevant during DNA  
554 synthesis? One possibility is that extrusion of DNA through PCNA exposes CAF-1 to increasing  
555 lengths of naked DNA. The ability of CAF-1 to preferentially bind to a tetrasome length of DNA  
556 (Figure 7a) could ensure sufficient DNA is available so that as histone binding releases the WHD,  
557 there will be sufficient space along the DNA for the subsequent assembly of tetrasomes, while  
558 simultaneously protecting newly replicated DNA from spurious binding of other factors  
559 (Ramachandran and Henikoff, 2016). Loss of the KER can be compensated by the WHD (Figure  
560 1,7b), but deletion of both the KER and WHD renders yeast with a reduced ability to survive DNA  
561 damage or maintain gene silencing (Figure 7c). Moreover, the yKER is shorter than the KER in  
562 humans and many other eukaryotes, and correspondingly preferentially recognizes shorter DNA  
563 (Figure 6) than the hKER in the context of yCAF-1, which raises the possibility that the KER serves  
564 a spacer function to ensure that tetramers are assembled at specific spacings (Figure 7d). Classic  
565 SAHs (Dudola et al., 2017; Gáspári et al., 2012) predominantly use the long rigid helix to bridge  
566 two functional domains either as a linker, spacer or flexible spring (Wolny et al., 2014; Wolny et  
567 al., 2017; Kwon, Kim, and Lee, 2020; Bandera et al., 2021). Therefore, we propose that the KER  
568 SAH acts as a DNA binding physical spacer element and bridge that links with structural precision  
569 multiple functional domains within CAF-1 to configure the architecture of CAF-1 for efficient  
570 tetrasome assembly after DNA synthesis.

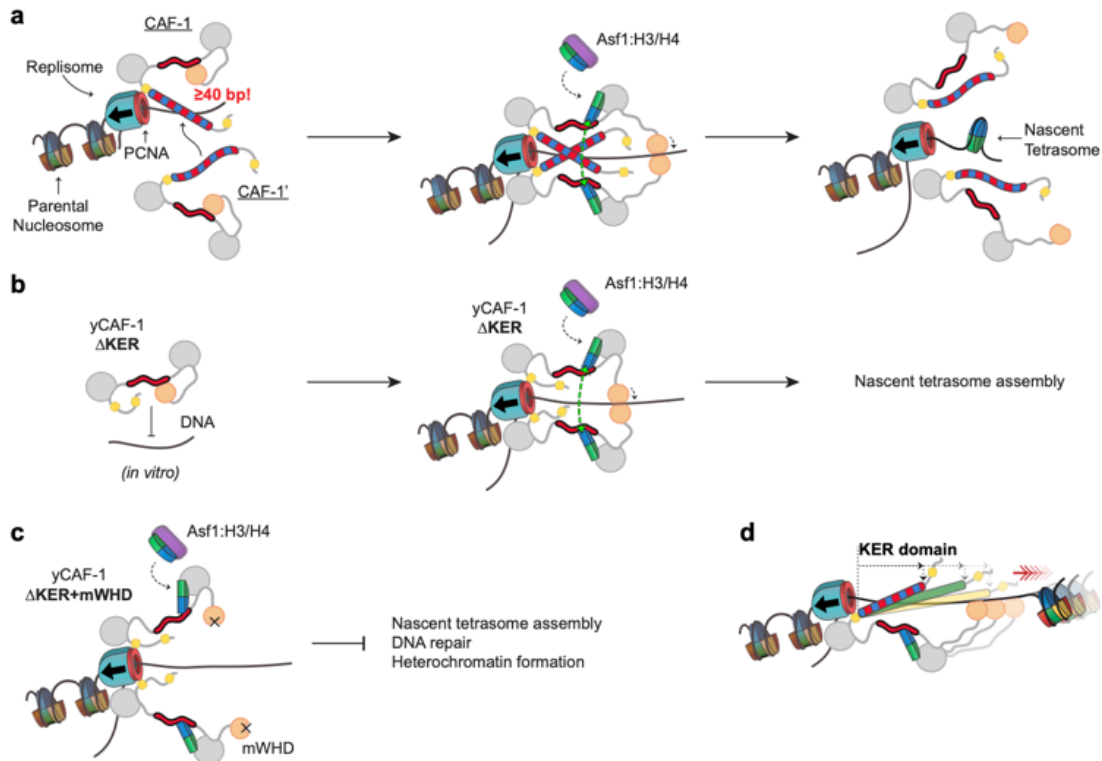

571

572 **Figure 7. Proposed molecular mechanism model of KER-mediated nascent tetrasome**  
 573 **assembly by CAF-1.** **a**, The KER safeguards DNA for tetrasome assembly. Because the KER  
 574 has strong binding affinity towards DNA and is readily competent for binding, recruitment of CAF-1  
 575 to DNA through the KER can be an initial transient state prior to assembly of tetrasomes during  
 576 DNA replication (left panel). Furthermore, the KER's DNA-length selectivity function equips CAF-  
 577 1 to bind to free DNA regions that are tetrasome-length ( $\geq 40$  bp). While CAF-1 is bound to DNA  
 578 through the KER, CAF-1 can receive newly synthesized H3/H4 dimers from the histone  
 579 chaperone Anti-silencing Function 1 (Asf1) which in turn facilitates DNA binding of the WHD  
 580 (middle panel). Both, the KER and WHD, bind cooperatively to DNA which facilitate the  
 581 recruitment of two copies of the CAF-1-H3/H4 complex to the same DNA vicinity (middle panel).  
 582 A transient DNA-(CAF-1-H3/H4)<sub>2</sub> complex provides the conditions to favor the formation of the  
 583 H3/H4 tetramer (middle panel, green arrows) following its the deposition on DNA and presumably  
 584 ejecting CAF-1 from the DNA (right panel). **b,c**, Deletion of the KER from yCAF-1 (yCAF-1  $\Delta$ KER)  
 585 impairs binding to DNA *in vitro*, presumably because the WHD binds more weakly to DNA and is  
 586 in an autoinhibited state. But *in vivo* yCAF-1  $\Delta$ KER is still competent for tetrasome assembly with  
 587 minimal sensitivity to DNA damage and defects on heterochromatin formation. **d**, In contrast,  
 588 deletion of the KER ( $\Delta$ KER) in combination with inhibition of the DNA binding function of the WHD  
 589 (mWHD) dramatically impairs DNA repair and heterochromatin formation functions of yCAF-1 *in*  
 590 *vivo*. Because in  $\Delta$ KER+mWHD cells yCAF-1 has no detectable functional DNA binding domain,  
 591 tetrasome formation cannot occur efficiently. **d**, The length of the KER domain in CAF-1 varies  
 592 across species and it can alter the DNA-length recognized by CAF-1 *in vitro*, which could alter  
 593 tetrasome assembly during DNA replication.



## 594 **Materials and Methods**

### 595 **Expression and purification of Cac1 subunits and CAF-1 proteins from insect cells.**

596 For expression in insect cells, baculoviruses harboring yCAF-1 subunits and mutants were  
597 made using the Gateway technology subcloning system (Thermo Fisher Scientific). The  
598 pDONR/Zeo plasmid containing the sequence encoding Cac1 subunit (Cac1, pDONR/Zeo;  
599 Supplementary Table 1) was used for mutagenesis experiments. Briefly, the Cac1, pDONR/Zeo  
600 plasmid was linearized via Polymerase Chain Reaction (PCR) with the Q5 DNA polymerase  
601 (NEB) and a pair of primers for each Cac1 mutant that anneal to the sequences flanking the  
602 section to be modified (Supplementary Table 2). The primers also had complementary sequences  
603 with overhangs: to each other for deletion of Cac1 regions, or to a double-stranded DNA fragment  
604 either synthetically manufactured (Integrated DNA Technologies) or PCR-amplified from cDNA  
605 for the exogenous incorporation of other genes or duplication of Cac1 sequences (Supplementary  
606 Table 2). Circularization of the modified Cac1, pDONR/Zeo (Supplementary Table 1) plasmid with  
607 the desired mutation was done via In-Fusion technology (Takara). Each pDONR/Zeo Cac1 mutant  
608 plasmid was verified by Sanger sequencing. Cac1 mutants from the pDONR/Zeo plasmids were  
609 then sub-cloned into the pDEST8 vector via Gateway technology (Thermo Fisher Scientific)  
610 followed by Sanger sequencing verification (Supplementary Table 1). Finally, to generate  
611 Baculovirus stocks of each Cac1 mutant, we used the Bac-to-Bac system (Thermo Fisher  
612 Scientific), where the generated pDEST8 plasmids were transformed into DH10Bac E. coli cells  
613 (Thermo Fisher Scientific) to generate bacmids competent for baculovirus production in Sf9 cells  
614 (Thermo Fisher Scientific) via transfection. Media containing secreted baculovirus from cultured  
615 Sf9 cells was stored at 4 °C and used for subsequent protein production.

616 Full-length yCAF-1 and complex mutants were expressed for 72 hours in High Five cells  
617 (Thermo Fisher Scientific) infected with a baculovirus stock of Cac1 with a C-terminal Strep II  
618 epitope, Cac2 with a C-terminal His<sub>6</sub> or Strep II epitope, and Cac3 with a C-terminal 3xFLAG  
619 epitope. Purification of the CAF-1 complexes was carried out as before ([Liu et al., 2012](#)) where

620 cell pellets were homogenized in 20 mM HEPES pH 7.4, 350 mM NaCl, 1 mM DTT, 10 µg/mL  
621 DNase I, 1 mM Na<sub>3</sub>VO<sub>4</sub>, 10 mM NaF, 1mM PMSF, and a cocktail of protease inhibitors (Tablet  
622 EDTA-free, Sigma). Homogenate was clarified by centrifugation at 10 000 g for 45 min. at 4 °C,  
623 followed by affinity chromatography with a StrepTrap HP column (Cytiva) and washed extensively  
624 with 20 mM HEPES pH 7.4, 350 mM NaCl, and 0.5 mM TCEP. Protein was eluted with the wash  
625 buffer containing 2.5 mM d-Desthiobiotin (MilliporeSigma). Purified yCAF-1 complexes (Figure 1-  
626 figure supplement 1a) were concentrated with 100 000 MWCO centrifugal concentrators  
627 (Sartorius), aliquoted in small volumes, flash frozen in liquid nitrogen, and stored at -80 °C.

628

### 629 **Expression and purification of CAF-1 domains and Myosin 7a SAH from *E. coli*.**

630 Plasmids for bacterial expression were generated using the Gateway technology subcloning  
631 system (Thermo Fisher Scientific). The initial double-stranded DNA insert containing the cDNA  
632 that encodes for the protein of interest was obtained either synthetically manufactured (Integrated  
633 DNA Technologies) or by PCR amplification from cDNA of a plasmid containing the full-length  
634 protein (Supplementary Table 2). To obtain the double-stranded DNA insert for human KER, *E.*  
635 *coli* codon optimized CHAF1A cDNA was first cloned into a pGEX-6P-1 vector via In Fusion  
636 (Takara) (Supplementary Table 3). For Gateway cloning, the double-stranded DNA inserts were  
637 subcloned into the pDONR/Zeo and pDEST566 vectors followed by Sanger sequencing  
638 verification of each plasmid (Supplementary Table 1).

639 Yeast Cac1 KER constructs (full-length and truncations), human CHAF1A KER, and  
640 Myosin 7 SAH cloned into the pDEST566 vector produced an N-terminal His<sub>6</sub>-MBP-tagged  
641 polypeptide with a PreScission protease site downstream of the MBP. Proteins used in CD or  
642 EMSA experiments contained an exogenous Tyrosine amino acid as the very last C-terminal  
643 residue to facilitate the determination of protein concentration via UV absorption after removal of  
644 the His<sub>6</sub>-MBP tag. Expression of the His<sub>6</sub>-MBP-tagged proteins were carried out in Rosetta 2  
645 (DE3) pLysS cells cultured in Luria Broth media at 37 °C. Bacterial cultures were induced for

646 expression with 0.5 mM IPTG when culture reached a 600 nm optical density of 0.8 and let  
647 incubate for another 3 to 4 hours at 37 °C. Subsequently, cell pellets were harvested and  
648 resuspended in 25 mM Tris pH 7.5, 50 mM NaCl, 10 µg/mL DNaseI, 1 mM PMSF, and a cocktail  
649 of protease inhibitors (Tablet EDTA-free, Roche). The lysate was sonicated and then clarified by  
650 centrifugation at 10,000 g for 45 min at 4 °C. The resulting supernatant was then bound to an  
651 agarose Ni-NTA resin (Qiagen) and incubated for at least 2 hours at 4 °C followed by extensive  
652 washes with 25 mM Tris pH 7.5, 1 M NaCl and 1 mM PMSF. Protein was eluted from the Ni-NTA  
653 resin with 25 mM Tris pH 7.5, 20 mM NaCl, 500 mM Imidazole and 1 mM PMSF, and further  
654 purified by ion exchange chromatography using an SP FF or Source S15 column (Cytiva) with a  
655 30-column volumes salt gradient from 20 mM to 1 M NaCl for elution. Purified His<sub>6</sub>-MBP-tagged  
656 proteins were then concentrated with a 30,000 MWCO centrifugal concentrator (Sartorius) and  
657 buffer exchanged into 20 mM HEPES pH 7.5 and 50 mM NaCl for crystallization, or in 50 mM Tris  
658 pH 7.5, 150 mM NaCl, 1 mM EDTA, 1 mM DTT and 0.01 % Triton X-100 for enzymatic removal  
659 of the His<sub>6</sub>-MBP tag with PreScission protease. PreScission protease was added to the His<sub>6</sub>-MBP-  
660 tagged proteins and incubated overnight at 4 °C. Cleaved proteins were further purified by ion  
661 exchanged as described above, followed by concentration with a 3,000 MWCO and buffer  
662 exchange into 20 mM HEPES pH 7.5, 150 mM NaCl, and 0.2 mM TCEP (Figure 1-figure  
663 supplement 1b). Concentrated proteins were aliquoted in small volumes, flash frozen in liquid  
664 nitrogen, and stored at -80 °C.

665 The Cac1 WHD construct was expressed and purified as before ([Liu et al., 2016](#)) using  
666 the Cac1 WHD, pGEX-6P-1 plasmid (Supplementary Table 1).

667

### 668 **Preparation of DNA templates.**

669 DNA fragments of varying lengths were designed around the dyad of the 147 bp 601 DNA  
670 sequence ([Lowary and Widom, 1998](#); [Luger et al., 1997](#)). Synthetic oligonucleotides for

671 production of dsDNA (Integrated DNA Technologies) had only one strand containing a Cy5  
672 fluorophore at the 5' end (Supplementary Table 2).

673 Each oligonucleotide was resuspended in 10 mM Tris-HCl and 1 mM EDTA at pH 8.0 (TE  
674 buffer) and non-fluorophore labeled oligonucleotides were purified using C18 Sep-Pak cartridges  
675 (Waters). Annealing of complementary oligonucleotides was done by heating an equimolar  
676 combination of each strand at 95 °C and then cooling slowly to room temperature in TE Buffer  
677 with 5 mM NaCl. Annealed DNA duplexes were purified by ion exchange chromatography using  
678 a DEAE column (Tosoh Bioscience) under a gradient of 0 to 1 M NaCl in TE Buffer. Purified DNA  
679 was ethanol precipitated and resuspended in TE Buffer.

680 The 10 to 100 bp DNA step ladder was purchased from Promega (Cat. G447A).

681

## 682 **Electrophoretic mobility shift assays (EMSA).**

683 Increasing concentrations of protein that ranged from 9 nM to 10 µM were incubated with 1  
684 or 3 nM of Cy5-labeled DNA in 20 mM HEPES pH 7.4, 150 mM NaCl and 0.5 mM TCEP for 1  
685 hour on ice. The Protein-DNA species were separated by electrophoresis in 0.2X TBE 4, 5, 6, or  
686 10 % 59:1 acrylamide:bis-acrylamide native gels for 60 min. at 70 V on ice. Fluorescence from  
687 the Cy5 fluorophore was detected by imaging the native gels on a c600 (Azure Biosystem) or a  
688 Sapphire Biomolecular (Azure Biosystems) imager. To determine dissociation constants between  
689 the Protein and DNA substrates, the intensity of each DNA band was determined using the  
690 AzureSpot software (Azure Biosystems), followed by background subtraction and calculation of  
691 the DNA fraction bound. Finally, Protein concentrations ([Protein]) and DNA fraction bound values  
692 were plotted and the binding curves fitted with Equation 1 using the Prism software (GraphPad):

693 Eqn 1.

$$694 \text{ Fraction Bound} = \frac{B_{\max} \times [\text{Protein}]^h}{K_D^h + [\text{Protein}]^h}$$

695 where h corresponds to the Hill coefficient,  $K_D$  is the dissociation constant and  $B_{\max}$  represents

696 maximum binding. All EMSA experiments were done at least three times and the reported  $K_D$   
697 values and Hill coefficients correspond to the average of the multiple measurements. Error bars  
698 represent the standard deviation.

699 EMSA experiments using the commercial 10 bp DNA step ladder substrate contained 500  
700 nM total DNA and gels were stained with SYBR Green I stain (Invitrogen) prior to imaging.

701 In the Cy5-DNA ladder assay, the signal of the free DNA of a particular fragment from  
702 subsequent protein titration was normalized to the signal of the free DNA in the absence of protein  
703 (normalized free DNA). To obtain the protein concentrations at which 50% of the DNA was  
704 depleted, we first fitted binding curves (Eqn. 1) to the data and selected the protein concentration  
705 at which 50% of the DNA on each curve occurred, using the error range of the 95% confidence  
706 limit for the fitted curve.

707

#### 708 **Structure determination and analyses.**

709 The His<sub>6</sub>-MBP-yKER (Cac1 residues 136–225) protein was expressed and purified as  
710 described above and protein was concentrated to 25 mg/mL in 20 mM HEPES pH 7.5 and  
711 incubated with 200 mM NDSB-256. Protein crystals grew in 0.1 M Phosphate/citrate pH 4.2 and  
712 30 % PEG 300 using the hanging drop vapor diffusion method at 15 °C. Data were collected using  
713 a Rigaku Micromax 007 high flux microfocus X-ray generator equipped with a VariMax high flux  
714 optic, an AFC11 4-axis goniometer, a Pilatus 200K 2D area detector, and an Oxford cryo-system.  
715 Data were initially processed using the HKL-3000R software (HKL Research Inc.) and phased by  
716 molecular replacement using the structure of MBP (PDB ID: 1PEB) as the search model ([Telmer  
717 and Shilton, 2003](#)). The structure was solved at a resolution of 2.81 Å. The model was built using  
718 COOT ([Emsley and Cowtan, 2004](#)) and refinement was conducted using PHENIX ([Afonine et al.,  
719 2012](#)), to achieve acceptable geometry and stereochemistry. Group TLS refinement was used in  
720 the refinement as there were large regions of chain, with much higher than average B-factors.  
721 Several sections of chain D are poorly defined due to this disorder. The quality of the structure

722 (PDB ID: 8DEI) was analyzed (Supplementary Table 4) and the root mean squared deviation  
723 (R.M.S.D.) values were calculated using PyMol and COOT. Figures were made using PyMol and  
724 Photoshop (Adobe).

725

## 726 **Circular Dichroism (CD) spectroscopy.**

727 Proteins were prepared for CD at a concentration of 0.1 mg/mL in 10 mM Na-Phosphate  
728 Buffer at pH 7.4 and 50 mM NaCl. KER samples containing DNA were mixed at 1:1 molar  
729 concentration of protein and 40 bp 601 DNA. All samples were analyzed in a cuvette with a path  
730 length of 1 mm on a Jasco J-815 CD Spectrophotometer equipped with a Lauda Brinkman ecoline  
731 RE 106 temperature controller. CD was measured in millidegrees from 185 to 350 nm  
732 wavelengths with a bandpass of 1 nm and a step size of 1.0 nm. Six scans of each sample were  
733 averaged per experiment with at least three independent replicates. Equation 2 was used to  
734 calculate Mean Residue Ellipticity (MRE) ([Woody, 1996](#)):

735 Eqn. 2

$$736 \text{ MRE} = \frac{m^0 \times \frac{\text{MW}}{n-1}}{10 \times L \times C}$$

737 Where  $m^0$  is the observed ellipticity in millidegrees, MW is the molecular weight of the protein in  
738 g/mol, n is the number of residues of the protein, L is the path length of cell, and C is the  
739 concentration of the protein in g/L.

740 To calculate the fractional helicity of a protein sample, we used the 222 nm wavelength  
741 method ([Wei, Thyparambil, and Latour, 2014](#)) (Eqn. 3):

742 Eqn. 3

$$743 \text{ fractional helicity} = \frac{\theta_{222}^{\text{exp}} - \theta_{222}^{\text{u}}}{\theta_{222}^{\text{h}} - \theta_{222}^{\text{u}}}$$

744 where  $\theta_{222}^{\text{exp}}$  is the experimentally observed MRE at 222 nm of the protein sample, and  $\theta_{222}^{\text{u}}$  and  
745  $\theta_{222}^{\text{h}}$  are the MRE at 222 nm of a protein with 0 % and 100 % helical content which are estimated

746 to be -3 000 and -39 000 deg<sup>2</sup>cm<sup>2</sup>mol<sup>-1</sup>, respectively.

747

#### 748 **Chemical crosslinking.**

749 DSS crosslinker (Thermo Pierce) was prepared at 2 mM by dissolution in DMSO. 10 μM  
750 yKER (Cac1 residues 136 – 225 with additional C'-terminal Tyrosine) was allowed to incubate  
751 with 200 μM DSS or DMSO for 30 min at room temperature in 10 mM Phosphate Buffer at pH 7.5,  
752 150 mM NaCl, and 0.5 mM TCEP. The cross-linking reaction was quenched by addition of 50 mM  
753 Tris pH 7.4 and incubated for an additional 15 min. The reactions were resolved in a 4 –15 %  
754 Tris-HCl SDS-PAGE (BioRad) and stained with Coomassie Blue.

755

#### 756 **Yeast strains and primers.**

757 The yeast strains used in this study and their genotypes are fully described in  
758 Supplementary Table 3. Strains used in DNA damage sensitivity assays and western blotting  
759 were isogenic to W303-1a ([Thomas and Rothstein, 1989](#)), while strains used to assay silencing  
760 at the *HMR* locus were isogenic to BY4741([Baker Brachmann et al., 1998](#)). Mutations in the *CAC1*  
761 gene were made using CRISPR-Cas9 ([Ryan, Poddar, and Cate, 2016](#)) to mutate the endogenous  
762 *CAC1* (RLF2) locus. Sequences of gRNA and HDR template DNA used to generate each mutant  
763 are listed in Supplementary Table 2. Where indicated, strains were deleted for *RTT106* or *CAC1*  
764 using pFA6a-HIS3MX6 ([Longtine et al., 1998](#)) and pFA6a-KANMX6 ([Bähler et al., 1998](#))  
765 respectively.

766

#### 767 **DNA damage sensitivity assay.**

768 Cells were grown in YPD media until reaching mid-log phase (OD 0.8-1.0). They were  
769 collected by centrifugation, resuspended in sterile water, and five-fold serially diluted before  
770 spotting onto YPD agar plates containing the indicated concentrations of the DNA-damaging

771 drugs Zeocin (Invitrogen R25001) or CPT (Cayman Chemical 11694). Plates were grown for 3  
772 days at 30°C before imaging.

773

#### 774 **Measurement of loss of silencing at the *HMR* locus.**

775 To observe loss of silencing at the *HMR* locus, cells isogenic to BY4741 were transformed  
776 with the plasmid pHMR::P<sub>URA3</sub>-GFP/URA3 after EcoRI/XhoI digestion (Laney and Hochstrasser,  
777 2003). In WT cells, this GFP reporter is silenced, while mutants with loss of silencing express  
778 GFP at varying levels that was detected by flow cytometry (Huang et al., 2005). 0.5 mL of mid-  
779 log phase (OD 0.8-1.0) cells growing in synthetic complete (SC) media containing 2% dextrose  
780 were collected by centrifugation, washed twice with ice-cold PBS, and resuspended in 1 mL of  
781 PBS before analysis on a flow cytometer (BD Biosciences BD® LSR II). Cells deleted for *SIR2*  
782 (*sir2Δ*) have a severe silencing defect and were used as a positive control. As indicated in Figure  
783 1-figure supplement 2f, a gate containing <1 % of WT cells and >97 % of *sir2Δ* cells was drawn  
784 and used to identify the percent of cells with loss of silencing. As previously observed, the  
785 percentage of WT cells with loss of silencing varied from ~0.3-2.5 % across experiments. Data is  
786 presented as the average ± standard deviation of at least three experiments performed on  
787 independent yeast colonies.

788

#### 789 **Western blot for Cac1-FLAG.**

790 1 OD of cells with an endogenous C-terminal FLAG tag on *CAC1* were grown in YPD to  
791 mid-log phase, collected, flash-frozen in liquid nitrogen, resuspended in 100 μL of modified  
792 Laemmli buffer (Horvath and Riezman, 1994), and boiled for 5 minutes. Proteins were separated  
793 on a 10% SDS-PAGE gel and Western blotting was performed using anti-FLAG M2 (Sigma  
794 F3165) and anti-GAPDH (Sigma A9521).

795



796 **Data Availability**

797 Diffraction data have been deposited in the PDB under the accession code 8DEI. All plasmids are  
798 available by request.

799

800 **Acknowledgements**

801 We appreciate the contributions of Dr. Ying-Chih Chi for preparing the initial CHAF1A expression  
802 plasmid and Dr. Mark Hochstrasser for providing the pHMR::PURA3-GFP/URA3 plasmid to us.  
803 We thank the Biophysical core facility at CU-Anschutz for experimental advice and assistance, as  
804 well as the Structural Biology Shared Resources of the University of Colorado Cancer Center  
805 supported by NIH P30 CA046934. This work was supported by NIH R01 GM135604 to M.E.A.C.,  
806 R01 CA95641 to J.K.T. and NIH Shared instrumentation grant S10 OD012033. R.R.A. was  
807 supported by a Medical Scientist Training Program grant from the National Institute of General  
808 Medical Sciences of the National Institutes of Health under award number: T32GM007739 to the  
809 Weill Cornell/Rockefeller/Sloan Kettering Tri-Institutional MD-PhD Pro-gram, and a diversity  
810 supplement on grant RO1 GM64475 to J.K.T.

811

812 **Competing Interests**

813 JKT, eLife Senior Editor

814

815 **References**

- 816 Afonine, Pavel V., Ralf W. Grosse-Kunstleve, Nathaniel Echols, Jeffrey J. Headd, Nigel W.  
817 Moriarty, Marat Mustyakimov, Thomas C. Terwilliger, Alexandre Urzhumtsev, Peter H.  
818 Zwart, and Paul D. Adams. 2012. 'Towards automated crystallographic structure  
819 refinement with phenix.refine', *Acta Crystallographica Section D: Biological*  
820 *Crystallography*, 68: 352-67.
- 821 Bähler, Jürg, Jian-Qiu Wu, Mark S. Longtine, Nirav G. Shah, Amos McKenzie Iii, Alexander B.  
822 Steever, Achim Wach, Peter Philippsen, and John R. Pringle. 1998. 'Heterologous  
823 modules for efficient and versatile PCR-based gene targeting in *Schizosaccharomyces*  
824 *pombe*', *Yeast*, 14: 943-51.
- 825 Baker Brachmann, Carrie, Adrian Davies, Gregory J. Cost, Emerita Caputo, Joachim Li, Philip  
826 Hieter, and Jef D. Boeke. 1998. 'Designer deletion strains derived from *Saccharomyces*  
827 *cerevisiae* S288C: A useful set of strains and plasmids for PCR-mediated gene  
828 disruption and other applications', *Yeast*, 14: 115-32.
- 829 Baker, Richard W., Janice M. Reimer, Peter J. Carman, Bengi Turegun, Tsutomu Arakawa,  
830 Roberto Dominguez, and Andres E. Leschziner. 2021. 'Structural insights into assembly  
831 and function of the RSC chromatin remodeling complex', *Nature Structural & Molecular*  
832 *Biology*, 28: 71-80.
- 833 Bandera, Adrian M, Joseph Bartho, Katja Lammens, David Jan Drexler, Jasmin Kleinschwärzer,  
834 Karl-Peter Hopfner, and Gregor Witte. 2021. 'BusR senses bipartite DNA binding motifs  
835 by a unique molecular ruler architecture', *Nucleic Acids Research*, 49: 10166-77.

- 836 Barnes, C. Ashley, Yang Shen, Jinfa Ying, Yasuharu Takagi, Dennis A. Torchia, James R.  
837 Sellers, and Ad Bax. 2019. 'Remarkable Rigidity of the Single  $\alpha$ -Helical Domain of  
838 Myosin-VI As Revealed by NMR Spectroscopy', *Journal of the American Chemical*  
839 *Society*, 141: 9004-17.
- 840 Batchelor, Matthew, Marcin Wolny, Emily G. Baker, Emanuele Paci, Arnout P. Kalverda, and  
841 Michelle Peckham. 2019. 'Dynamic ion pair behavior stabilizes single  $\alpha$ -helices in  
842 proteins', *Journal of Biological Chemistry*, 294: 3219-34.
- 843 Chankova, S. G., E. Dimova, M. Dimitrova, and P. E. Bryant. 2007. 'Induction of DNA double-  
844 strand breaks by zeocin in *Chlamydomonas reinhardtii* and the role of increased DNA  
845 double-strand breaks rejoining in the formation of an adaptive response', *Radiation and*  
846 *Environmental Biophysics*, 46: 409-16.
- 847 Cheloufi, Sihem, Ulrich Elling, Barbara Hopfgartner, Youngsook L. Jung, Jernej Murn, Maria  
848 Ninova, Maria Hubmann, Aimee I. Badeaux, Cheen Euong Ang, Danielle Tenen, Daniel  
849 J. Wesche, Nadezhda Abazova, Max Hogue, Nilgun Tasdemir, Justin Brumbaugh,  
850 Philipp Rathert, Julian Jude, Francesco Ferrari, Andres Blanco, Michaela Fellner, Daniel  
851 Wenzel, Marietta Zinner, Simon E. Vidal, Oliver Bell, Matthias Stadtfeld, Howard Y.  
852 Chang, Genevieve Almouzni, Scott W. Lowe, John Rinn, Marius Wernig, Alexei Aravin,  
853 Yang Shi, Peter J. Park, Josef M. Penninger, Johannes Zuber, and Konrad  
854 Hochedlinger. 2015. 'The histone chaperone CAF-1 safeguards somatic cell identity',  
855 *Nature*, 528: 218-24.
- 856 Cheloufi, Sihem, and Konrad Hochedlinger. 2017. 'Emerging roles of the histone chaperone  
857 CAF-1 in cellular plasticity', *Current Opinion in Genetics and Development*, 46: 83-94.

- 858 Churchill, M. E., D. N. Jones, T. Glaser, H. Hefner, M. A. Searles, and A. A. Travers. 1995.  
859 'HMG-D is an architecture-specific protein that preferentially binds to DNA containing the  
860 dinucleotide TG', *The EMBO Journal*, 14: 1264-75.
- 861 Churchill, Mair E. A., Anita Changela, Linda K. Dow, and Adam J. Krieg. 1999. 'Interactions of  
862 high mobility group box proteins with DNA and chromatin.' in, *Methods in Enzymology*  
863 (Academic Press).
- 864 Churchill, Mair E. A., and Andrew A. Travers. 1991. 'Protein motifs that recognize structural  
865 features of DNA', *Trends in Biochemical Sciences*, 16: 92-97.
- 866 Donham, Douglas C., Jean K. Scorgie, and Mair E. A. Churchill. 2011. 'The activity of the  
867 histone chaperone yeast Asf1 in the assembly and disassembly of histone H3/H4–DNA  
868 complexes', *Nucleic Acids Research*, 39: 5449-58.
- 869 Dudola, Dániel, Gábor Tóth, László Nyitray, and Zoltán Gáspári. 2017. 'Consensus Prediction of  
870 Charged Single Alpha-Helices with CSAHserver.' in Yaoqi Zhou, Andrzej Kloczkowski,  
871 Eshel Faraggi and Yuedong Yang (eds.), *Prediction of Protein Secondary Structure*  
872 (Springer New York: New York, NY).
- 873 Emsley, P., and K. Cowtan. 2004. 'Coot: model-building tools for molecular graphics', *Acta*  
874 *Crystallographica. Section D: Biological Crystallography*, 60: 2126-32.
- 875 Eng, W. K., L. Faucette, R. K. Johnson, and R. Sternglanz. 1988. 'Evidence that DNA  
876 topoisomerase I is necessary for the cytotoxic effects of camptothecin', *Molecular*  
877 *Pharmacology*, 34: 755.

- 878 Escobar, Thelma M., Alejandra Loyola, and Danny Reinberg. 2021. 'Parental nucleosome  
879 segregation and the inheritance of cellular identity', *Nature Reviews Genetics*, 22: 379-  
880 92.
- 881 Gaillard, P. H., E. M. Martini, P. D. Kaufman, B. Stillman, E. Moustacchi, and G. Almouzni.  
882 1996. 'Chromatin assembly coupled to DNA repair: a new role for chromatin assembly  
883 factor I', *Cell*, 86: 887-96.
- 884 Gangelhoff, Todd A., Purnima S. Mungalachetty, Jay C. Nix, and Mair E. A. Churchill. 2009.  
885 'Structural analysis and DNA binding of the HMG domains of the human mitochondrial  
886 transcription factor A', *Nucleic Acids Research*, 37: 3153-64.
- 887 Gáspári, Zoltán, Dániel Süveges, András Perczel, László Nyitray, and Gábor Tóth. 2012.  
888 'Charged single alpha-helices in proteomes revealed by a consensus prediction  
889 approach', *Biochimica et Biophysica Acta (BBA) - Proteins and Proteomics*, 1824: 637-  
890 46.
- 891 Hope, I. A., and K. Struhl. 1987. 'GCN4, a eukaryotic transcriptional activator protein, binds as a  
892 dimer to target DNA', *The EMBO Journal*, 6: 2781-84.
- 893 Horvath, Anton, and Howard Riezman. 1994. 'Rapid protein extraction from *Saccharomyces*  
894 *cerevisiae*', *Yeast*, 10: 1305-10.
- 895 Huang, Shengbing, Hui Zhou, David Katzmann, Mark Hochstrasser, Elena Atanasova, and  
896 Zhiguo Zhang. 2005. 'Rtt106p is a histone chaperone involved in heterochromatin-

- 897 mediated silencing', *Proceedings of the National Academy of Sciences of the United*  
898 *States of America*, 102: 13410-15.
- 899 Kaufman, P. D., R. Kobayashi, N. Kessler, and B. Stillman. 1995. 'The p150 and p60 subunits of  
900 chromatin assembly factor I: a molecular link between newly synthesized histones and  
901 DNA replication', *Cell*, 81: 1105-14.
- 902 Klemm, Sandy L., Zohar Shipony, and William J. Greenleaf. 2019. 'Chromatin accessibility and  
903 the regulatory epigenome', *Nature Reviews Genetics*, 20: 207-20.
- 904 Knoll, Kilian R., Sebastian Eustermann, Vanessa Niebauer, Elisa Oberbeckmann, Gabriele  
905 Stoehr, Kevin Schall, Alessandro Tosi, Marianne Schwarz, Andrea Buchfellner, Philipp  
906 Korber, and Karl-Peter Hopfner. 2018. 'The nuclear actin-containing Arp8 module is a  
907 linker DNA sensor driving INO80 chromatin remodeling', *Nature Structural & Molecular*  
908 *Biology*, 25: 823-32.
- 909 Krawitz, Denise C., Tamar Kama, and Paul D. Kaufman. 2002. 'Chromatin assembly factor I  
910 mutants defective for PCNA binding require Asf1/Hir proteins for silencing', *Molecular*  
911 *and Cellular Biology*, 22: 614-25.
- 912 Kwon, Na-Young, Youngjin Kim, and Jie-Oh Lee. 2020. 'The application of helix fusion methods  
913 in structural biology', *Current Opinion in Structural Biology*, 60: 110-16.
- 914 Laney, Jeffrey D., and Mark Hochstrasser. 2003. 'Ubiquitin-dependent degradation of the yeast  
915 Mat $\alpha$ 2 repressor enables a switch in developmental state', *Genes and Development*, 17:  
916 2259-70.

- 917 Li, Q., H. Zhou, H. Wurtele, B. Davies, B. Horazdovsky, A. Verreault, and Z. Zhang. 2008a.  
918 'Acetylation of histone H3 lysine 56 regulates replication-coupled nucleosome assembly',  
919 *Cell*, 134: 244-55.
- 920 Li, Qing, Hui Zhou, Hugo Wurtele, Brian Davies, Bruce Horazdovsky, Alain Verreault, and  
921 Zhiguo Zhang. 2008b. 'Acetylation of histone H3 lysine 56 regulates replication-coupled  
922 nucleosome assembly', *Cell*, 134: 244-55.
- 923 Liu, Wallace H., Sarah C. Roemer, Alex M. Port, and Mair E. A. Churchill. 2012. 'CAF-1-induced  
924 oligomerization of histones H3/H4 and mutually exclusive interactions with Asf1 guide  
925 H3/H4 transitions among histone chaperones and DNA', *Nucleic Acids Research*, 40:  
926 11229-39.
- 927 Liu, Wallace H., Sarah C. Roemer, Yeyun Zhou, Zih-Jie Shen, Briana K. Dennehey, Jeremy L.  
928 Balsbaugh, Jennifer C. Liddle, Travis Nemkov, Natalie G. Ahn, Kirk C. Hansen, Jessica  
929 K. Tyler, and Mair E. A. Churchill. 2016. 'The Cac1 subunit of histone chaperone CAF-1  
930 organizes CAF-1-H3/H4 architecture and tetramerizes histones', *eLife*, 5.
- 931 Longtine, Mark S., Amos McKenzie Iii, Douglas J. Demarini, Nirav G. Shah, Achim Wach, Arndt  
932 Brachat, Peter Philippsen, and John R. Pringle. 1998. 'Additional modules for versatile  
933 and economical PCR-based gene deletion and modification in *Saccharomyces*  
934 *cerevisiae*', *Yeast*, 14: 953-61.
- 935 Lowary, P. T., and J. Widom. 1998. 'New DNA sequence rules for high affinity binding to histone  
936 octamer and sequence-directed nucleosome positioning', *Journal of Molecular Biology*,  
937 276: 19-42.

- 938 Luger, Karolin, Armin W. Mäder, Robin K. Richmond, David F. Sargent, and Timothy J.  
939 Richmond. 1997. 'Crystal structure of the nucleosome core particle at 2.8 Å resolution',  
940 *Nature*, 389: 251-60.
- 941 Luscombe, Nicholas M., Susan E. Austin, Helen M. Berman, and Janet M. Thornton. 2000. 'An  
942 overview of the structures of protein-DNA complexes', *Genome Biology*, 1:  
943 reviews001.1.
- 944 Mattioli, Francesca, Yajie Gu, Tejas Yadav, Jeremy L. Balsbaugh, Michael R. Harris, Eileen S.  
945 Findlay, Yang Liu, Catherine A. Radebaugh, Laurie A. Stargell, Natalie G. Ahn, Iestyn  
946 Whitehouse, and Karolin Luger. 2017a. 'DNA-mediated association of two histone-bound  
947 CAF-1 complexes drives tetrasome assembly in the wake of DNA replication', *eLife*, 6:  
948 e22799-e99.
- 949 ———. 2017b. 'DNA-mediated association of two histone-bound complexes of yeast Chromatin  
950 Assembly Factor-1 (CAF-1) drives tetrasome assembly in the wake of DNA replication',  
951 *eLife*, 6.
- 952 Mello, J. A., H. H. Sillje, D. M. Roche, D. B. Kirschner, E. A. Nigg, and G. Almouzni. 2002.  
953 'Human Asf1 and CAF-1 interact and synergize in a repair-coupled nucleosome  
954 assembly pathway', *EMBO Rep*, 3: 329-34.
- 955 Pommier, Yves. 2006. 'Topoisomerase I inhibitors: camptothecins and beyond', *Nature Reviews*  
956 *Cancer*, 6: 789-802.



- 957 Ramachandran, Srinivas, and Steven Henikoff. 2016. 'Transcriptional Regulators Compete with  
958 Nucleosomes Post-replication', *Cell*, 165: 580-92.
- 959 Rine, Jasper, and Ira Herskowitz. 1987. 'Four Genes Responsible for a Position Effect on  
960 Expression From HML and HMR in *Saccharomyces cerevisiae*', *Genetics*, 116: 9-22.
- 961 Ryan, Owen W., Snigdha Poddar, and Jamie H. D. Cate. 2016. 'CRISPR–Cas9 Genome  
962 Engineering in *Saccharomyces cerevisiae* Cells', *Cold Spring Harbor Protocols*, 2016:  
963 pdb.prot086827.
- 964 Sauer, Paul V., Yajie Gu, Wallace H. Liu, Francesca Mattioli, Daniel Panne, Karolin Luger, and  
965 Mair E. A. Churchill. 2018. 'Mechanistic insights into histone deposition and nucleosome  
966 assembly by the chromatin assembly factor-1', *Nucleic Acids Research*.
- 967 Sauer, Paul Victor, Jennifer Timm, Danni Liu, David Sitbon, Elisabetta Boeri-Erba, Christophe  
968 Velours, Norbert Mücke, Jörg Langowski, Françoise Ochsenbein, Geneviève Almouzni,  
969 and Daniel Panne. 2017. 'Insights into the molecular architecture and histone H3-H4  
970 deposition mechanism of yeast Chromatin assembly factor 1', *eLife*, 6.
- 971 Shibahara, K., and B. Stillman. 1999. 'Replication-dependent marking of DNA by PCNA  
972 facilitates CAF-1-coupled inheritance of chromatin', *Cell*, 96: 575-85.
- 973 Sivaramakrishnan, Sivaraj, J. Spink Benjamin, Y. L. Sim Adelene, Sebastian Doniach, and A.  
974 Spudich James. 2008. 'Dynamic charge interactions create surprising rigidity in the ER/K  
975  $\alpha$ -helical protein motif', *Proceedings of the National Academy of Sciences of the United  
976 States of America*, 105: 13356-61.

- 977 Smith, Duncan J., and Iestyn Whitehouse. 2012. 'Intrinsic coupling of lagging-strand synthesis  
978 to chromatin assembly', *Nature*, 483: 434-38.
- 979 Smith, S., and B. Stillman. 1989. 'Purification and characterization of CAF-I, a human cell factor  
980 required for chromatin assembly during DNA replication in vitro', *Cell*, 58: 15-25.
- 981 ———. 1991. 'Stepwise assembly of chromatin during DNA replication in vitro', *The EMBO  
982 Journal*, 10: 971-80.
- 983 Süveges, Dániel, Zoltán Gáspári, Gábor Tóth, and László Nyitray. 2009. 'Charged single  $\alpha$ -  
984 helix: A versatile protein structural motif', *Proteins: Structure, Function, and  
985 Bioinformatics*, 74: 905-16.
- 986 Swanson, Carter J., and Sivaraj Sivaramakrishnan. 2014. 'Harnessing the Unique Structural  
987 Properties of Isolated  $\alpha$ -Helices\*', *Journal of Biological Chemistry*, 289: 25460-67.
- 988 Telmer, Patrick G., and Brian H. Shilton. 2003. 'Insights into the conformational equilibria of  
989 maltose-binding protein by analysis of high affinity mutants', *The Journal of biological  
990 chemistry*, 278: 34555-67.
- 991 Thomas, B. J., and R. Rothstein. 1989. 'The genetic control of direct-repeat recombination in  
992 *Saccharomyces*: the effect of rad52 and rad1 on mitotic recombination at GAL10, a  
993 transcriptionally regulated gene', *Genetics*, 123: 725-38.

- 994 Tyler, Jessica K., Christopher R. Adams, Shaw-Ree Chen, Ryuji Kobayashi, Rohinton T.  
995 Kamakaka, and James T. Kadonaga. 1999. 'The RCAF complex mediates chromatin  
996 assembly during DNA replication and repair', *Nature*, 402: 555-60.
- 997 Wei, Yang, Aby A. Thyparambil, and Robert A. Latour. 2014. 'Protein helical structure  
998 determination using CD spectroscopy for solutions with strong background absorbance  
999 from 190 to 230nm', *Biochimica et Biophysica Acta (BBA) - Proteins and Proteomics*,  
1000 1844: 2331-37.
- 1001 Wolberger, Cynthia. 2021. 'How structural biology transformed studies of transcription  
1002 regulation', *Journal of Biological Chemistry*, 296.
- 1003 Wolny, Marcin, Matthew Batchelor, Gail J. Bartlett, Emily G. Baker, Marta Kurzawa, Peter J.  
1004 Knight, Lorna Dougan, Derek N. Woolfson, Emanuele Paci, and Michelle Peckham.  
1005 2017. 'Characterization of long and stable de novo single alpha-helix domains provides  
1006 novel insight into their stability', *Scientific Reports*, 7: 44341.
- 1007 Wolny, Marcin, Matthew Batchelor, Peter J. Knight, Emanuele Paci, Lorna Dougan, and  
1008 Michelle Peckham. 2014. 'Stable Single  $\alpha$ -Helices Are Constant Force Springs in  
1009 Proteins', *Journal of Biological Chemistry*, 289: 27825-35.
- 1010 Woody, Robert W. 1996. 'Theory of Circular Dichroism of Proteins.' in Gerald D. Fasman (ed.),  
1011 *Circular Dichroism and the Conformational Analysis of Biomolecules* (Springer US:  
1012 Boston, MA).

- 1013 Yadav, Tejas, Jean-Pierre Quivy, and Geneviève Almouzni. 2018. 'Chromatin plasticity: A  
1014 versatile landscape that underlies cell fate and identity', *Science*, 361: 1332-36.
- 1015 Ye, Xiaofen, Alexa A. Franco, Hidelita Santos, David M. Nelson, Paul D. Kaufman, and Peter D.  
1016 Adams. 2003. 'Defective S phase chromatin assembly causes DNA damage, activation  
1017 of the S phase checkpoint, and S phase arrest', *Molecular Cell*, 11: 341-51.
- 1018 Zhang, Kuo, Yuan Gao, Jingjing Li, Rebecca Burgess, Junhong Han, Huanhuan Liang, Zhiguo  
1019 Zhang, and Yingfang Liu. 2016. 'A DNA binding winged helix domain in CAF-1 functions  
1020 with PCNA to stabilize CAF-1 at replication forks', *Nucleic Acids Research*, 44: 5083-94.  
1021  
1022

1023  
1024

## Supplementary Information

1025  
1026

**Supplementary Table 1.** List of plasmids.

| Plasmid                           | Description                                                                                                     | Reference                            |
|-----------------------------------|-----------------------------------------------------------------------------------------------------------------|--------------------------------------|
| Cac1, pDONR/Zeo                   | Cac1 with C-terminal StrepII tag                                                                                | ( <a href="#">Liu et al., 2012</a> ) |
| Cac1 $\Delta$ KER, pDONR/Zeo      | Cac1 without residues 136–225 and with C-terminal StrepII tag                                                   | This study                           |
| Cac1 $\Delta$ WHD, pDONR/Zeo      | Cac1 without residues 520–606 and with C-terminal StrepII tag                                                   | This study                           |
| Cac1 $\Delta$ middle-A, pDONR/Zeo | Cac1 without residues 155–204 and with C-terminal StrepII tag                                                   | This study                           |
| Cac1 ED::GSL, pDONR/Zeo           | Cac1 residues 397–431 were replaced with glycine/serine/leucine linker. Contains C-terminal StrepII tag         | This study                           |
| Cac1 +N-half, pDONR/Zeo           | Cac1 residues 136–172 were introduced after the endogenous 225 residue of Cac1. Contains C-terminal StrepII tag | This study                           |
| Cac1 2xKER, pDONR/Zeo             | Cac1 residues 136–225 were introduced after the endogenous 225 residue in Cac1. Contains C-terminal StrepII tag | This study                           |
| Cac1 KER::myosin7aSAH, pDONR/Zeo  | Cac1 residues 136–225 were replaced with mouse Myosin 7a residues 866–932. Contains a C-terminal StrepII tag    | This study                           |
| Cac1 KER::hKER, pDONR/Zeo         | Cac1 residues 136–225 were replaced with CHAF1A residues 331–441. Contains a C-terminal StrepII tag             | This study                           |
| Cac1, pDEST8                      | Cac1 with C-terminal StrepII tag                                                                                | This study                           |
| Cac1 $\Delta$ KER, pDEST8         | Cac1 without residues 136–225 and with C-terminal StrepII tag                                                   | This study                           |
| Cac1 $\Delta$ WHD, pDEST8         | Cac1 without residues 520–606 and with C-terminal StrepII tag                                                   | This study                           |
| Cac1 $\Delta$ middle-A, pDEST8    | Cac1 without residues 155–204 and with C-terminal StrepII tag                                                   | This study                           |
| Cac1 ED::GSL, pDEST8              | Cac1 residues 397–431 were replaced with glycine/serine/leucine linker. Contains C-terminal StrepII tag         | This study                           |
| Cac1 +N-half, pDEST8              | Cac1 residues 136–172 were introduced after the endogenous 225 residue of Cac1. Contains C-terminal StrepII tag | This study                           |
| Cac1 2xKER, pDONR/Zeo             | Cac1 residues 136–225 were introduced after the endogenous 225 residue in Cac1. Contains C-terminal StrepII tag | This study                           |
| Cac1 KER::myosin7aSAH, pDEST8     | Cac1 residues 136–225 were replaced with mouse Myosin 7a residues 866–932. Contains a C-terminal StrepII tag    | This study                           |
| Cac1 KER::hKER, pDEST8            | Cac1 residues 136–225 were replaced with hCHAF1A residues 331–441. Contains a C-terminal StrepII tag            | This study                           |

|                              |                                                     |                    |
|------------------------------|-----------------------------------------------------|--------------------|
| Cac2, pDONR/Zeo              | Cac2 with C-terminal StrepII tag                    | This study         |
| Cac2, pDEST8                 | Cac2 with C-terminal StrepII tag                    | This study         |
| Cac3, pDONR/Zeo              | Cac3 with C-terminal 3xFLAG tag                     | This study         |
| Cac3, pDEST8                 | Cac3 with C-terminal 3xFLAG tag                     | This study         |
| Cac1 KER, pDONR/Zeo          | Cac1 residues 136–225                               | This study         |
| Cac1 KER, pDEST566           | Cac1 residues 136–225                               | This study         |
| Cac1 KER, pDONR/Zeo          | Cac1 residues 136–225 with C-terminal tyrosine      | This study         |
| Cac1 KER, pDEST566           | Cac1 residues 136–225 with C-terminal tyrosine      | This study         |
| Cac1 N-half, pDONR/Zeo       | Cac1 residues 136–172 with C-terminal tyrosine      | This study         |
| Cac1 N-half, pDEST566        | Cac1 residues 136–172 with C-terminal tyrosine      | This study         |
| Cac1 C-half, pDONR/Zeo       | Cac1 residues 179–225 with C-terminal tyrosine      | This study         |
| Cac1 C-half, pDEST566        | Cac1 residues 179–225 with C-terminal tyrosine      | This study         |
| Cac1 middle-A, pDONR/Zeo     | Cac1 residues 155–204 with C-terminal tyrosine      | This study         |
| Cac1 middle-A, pDEST566      | Cac1 residues 155–204 with C-terminal tyrosine      | This study         |
| Cac1 middle-B, pDONR/Zeo     | Cac1 residues 173–204 with C-terminal tyrosine      | This study         |
| Cac1 middle-B, pDEST566      | Cac1 residues 173–204 with C-terminal tyrosine      | This study         |
| CHAF1A KER (hKER), pDONR/Zeo | CHAF1A residues 331–441 with C-terminal tyrosine    | This study         |
| CHAF1A KER (hKER), pDEST566  | CHAF1A residues 331–441 with C-terminal tyrosine    | This study         |
| Myosin 7a SAH, pDONR/Zeo     | Myosin 7a residues 866–932 with C-terminal tyrosine | This study         |
| Myosin 7a SAH, pDEST566      | Myosin 7a residues 866–932 with C-terminal tyrosine | This study         |
| Cac1 WHD, pGEX-6P-1          | Cac1 residues 457–606                               | (Liu et al., 2016) |
| CHAF1A, pGEX-6P-1            | Human CHAF1A                                        | This study         |

1028 **Supplementary Table 2.** List of synthetic DNA oligonucleotides and primers.  
1029

| <b>Name</b>                       | <b>Sequence (5'-3')</b>                                                                                                                                                                                                                                                |
|-----------------------------------|------------------------------------------------------------------------------------------------------------------------------------------------------------------------------------------------------------------------------------------------------------------------|
| Cy5 601 10 nts. Sense             | Cy5-CGCGCTGTCC                                                                                                                                                                                                                                                         |
| Cy5 601 20 nts. Sense             | Cy5-ACGTACGCGCTGTCCCCCGC                                                                                                                                                                                                                                               |
| Cy5 601 30 nts. Sense             | Cy5-AACGCACGTACGCGCTGTCCCCCGCGTTTT                                                                                                                                                                                                                                     |
| Cy5 601 40 nts. Sense             | Cy5-GCTTAAACGCACGTACGCGCTGTCCCCCGCGTTTTA<br>ACCG                                                                                                                                                                                                                       |
| 601 40 nts. Sense                 | GCTTAAACGCACGTACGCGCTGTCCCCCGCGTTTTAACC<br>G                                                                                                                                                                                                                           |
| Cy5 601 50 nts. Sense             | Cy5-GCACCGCTTAAACGCACGTACGCGCTGTCCCCCGC<br>GTTTTAACCGCCAAG                                                                                                                                                                                                             |
| Cy5 601 80 nts. Sense             | Cy5-GTCGTAGACAGCTCTAGCACCGCTTAAACGCACGTA<br>CGCGCTGTCCCCCGCGTTTTAACCGCCAAGGGGATTAC<br>TCCCTA                                                                                                                                                                           |
| 601 10 nts. Antisense             | GGACAGCGCG                                                                                                                                                                                                                                                             |
| 601 20 nts. Antisense             | GCGGGGGACAGCGCGTACGT                                                                                                                                                                                                                                                   |
| 601 30 nts. Antisense             | AAAACGCGGGGGACAGCGCGTACGTGCGTT                                                                                                                                                                                                                                         |
| 601 40 nts. Antisense             | CGGTTAAAACGCGGGGGACAGCGCGTACGTGCGTTAA<br>GC                                                                                                                                                                                                                            |
| 601 50 nts. Antisense             | CTTGCGGTTAAAACGCGGGGGACAGCGCGTACGTGC<br>GTTTAAGCGGTGC                                                                                                                                                                                                                  |
| 601 80 nts. Antisense             | TAGGGAGTAATCCCCTTGGCGGTTAAAACGCGGGGGAC<br>AGCGCGTACGTGCGTTTAAGCGGTGCTAGAGCTGTCTA<br>CGAC                                                                                                                                                                               |
| Cac1 $\Delta$ KER<br>Forward      | GCACAATCCCGTATTGGTAACTTCTTTAAAAAACTAAGCG                                                                                                                                                                                                                               |
| Cac1 $\Delta$ KER<br>Reverse      | TTACCAATACGGGATTGTGCCGATGAGGAAAGTTCTCTC<br>TTAGAGCATGG                                                                                                                                                                                                                 |
| Cac1 $\Delta$ middle-A Forward    | AGAAAAGAGGAGGAAAGATTGAAAAGGAGGAGGAAAT<br>ACG                                                                                                                                                                                                                           |
| Cac1 $\Delta$ middle-A Reverse    | AATCTTTCCTCCTCTTTTCTTTTCTTTCTTCTGCACGTTGCT<br>GCTTTTTTAGTTCC                                                                                                                                                                                                           |
| Cac1 $\Delta$ WHD Forward         | ATGCCAACCCCGTCTTTGTCAGGATGGAGCCACCCGCA<br>GTTGCGAAAAGTAG                                                                                                                                                                                                               |
| Cac1 $\Delta$ WHD Reverse         | GACAAAGACGGGGTTGGCATTCTTTTCGGGACTTTGA<br>GATTGGCTAGCGG                                                                                                                                                                                                                 |
| Cac1 KER::Myosin7a SAH<br>Forward | GCACAATCCCGTATTGGTAA                                                                                                                                                                                                                                                   |
| Cac1 KER::Myosin7a SAH<br>Reverse | CGATGAGGAAAGTTCTCTCT                                                                                                                                                                                                                                                   |
| Cac1 KER::Myosin7a SAH<br>dsDNA   | AGAGAGAACTTTCCTCATCGCGCCTGGAAGCGGAACGC<br>ATGCGCCTGGCGGAAGAAGAAAAGTGCGCAAAGAAAT<br>GAGCGCGAAAAAGCGAAAAGAAGAAGCGGAACGCAAAC<br>ATCAGGAACGCCTGGCGCAGCTGGCGCGCGAAGATGC<br>GGAACGCGAACTGAAAGAAAAGAAGAAGCGCGCCGCA<br>AAAAAGAACTGCTGGAACAGATGGAAAAGCGGCACAAT<br>CCCGTATTGGTAA |
| Cac1 ED::GSL<br>Forward           | AACAGTGATTTGGATGGCCTACCCTGC                                                                                                                                                                                                                                            |

|                            |                                                                                                                                                                                                                                                               |
|----------------------------|---------------------------------------------------------------------------------------------------------------------------------------------------------------------------------------------------------------------------------------------------------------|
| Cac1 ED::GSL Reverse       | TTCTTCTTCTTCATTAACCCATTCAACG                                                                                                                                                                                                                                  |
| Cac1 ED::GSL dsDNA         | GGGTTAATGAAGAAGAAGAAGGCTCACTGGGGTCCCTT<br>GGAAGCTTAGGGTCTCTTGGGTCCCTGGGCTCTTTAGG<br>AAGCCTTGTTCACTTGTTTCATTAGGATCCCTAGGATC<br>TTTGGGATCCAACAGTGATTTGGATGGCCT                                                                                                  |
| Cac1 2xKER Forward         | GCACAATCCCGTATTGGTAA                                                                                                                                                                                                                                          |
| Cac1 2xKER Reverse         | TCTTTCCTTGGCTTCTTCTTTCAAACG                                                                                                                                                                                                                                   |
| Cac1 2xKER dsDNA -Fwd      | AAGAAGAAGCCAAGGAAAGAAAAAAGGAAGAAGCTAAAA<br>GAGAAAAGG                                                                                                                                                                                                          |
| Cac1 2xKER dsDNA -Rev      | TTACCAATACGGGATTGTGCTCTTTCCTTGGCTTCTTCTT<br>TCAAACGTATTTCTCCTCC                                                                                                                                                                                               |
| Cac1 +N-half Forward       | GCACAATCCCGTATTGGTAA                                                                                                                                                                                                                                          |
| Cac1 +N-half Reverse       | TCTTTCCTTGGCTTCTTCTTTCAAACG                                                                                                                                                                                                                                   |
| Cac1 +N-half dsDNA         | AAGAAGAAGCCAAGGAAAGAAAAAAGGAAGAAGCTAAAA<br>GAGAAAAGGAACTAAAAAAGCAGCAACGTGCAGAAGAG<br>AAACACAGAAAAGAGTTATTACGACAAGAAGAGAAAAAG<br>AAAAAAGAGCTAAAGGCACAATCCCGTATTGGTAA                                                                                           |
| Cac1 KER::hKER Forward     | GCACAATCCCGTATTGGTAA                                                                                                                                                                                                                                          |
| Cac1 KER::hKER Reverse     | CGATGAGGAAAGTTCTCTCT                                                                                                                                                                                                                                          |
| Cac1 KER::hKER dsDNA - Fwd | AGAGAGAACTTTTCTCATCGGAAAAGAACAACACTGCGCC<br>TGCAACGCGACC                                                                                                                                                                                                      |
| Cac1 KER::hKER dsDNA - Rev | TTACCAATACGGGATTGTGCTTCCGCTTTGATACGCTTTT<br>CTTC                                                                                                                                                                                                              |
| Cac1 KER Forward           | CTGTTCCAGGGGCCCTGAAAAGGAAGAAGCTAAAAG<br>AGAAAAGG                                                                                                                                                                                                              |
| Cac1 KER Reverse           | GGGGACCACTTTGTACAAGAAAGCTGGGTCCTACTATCT<br>TTCCTTGGCTTCTTCTTTT                                                                                                                                                                                                |
| Cac1 KER Reverse +Y        | GGGGACCACTTTGTACAAGAAAGCTGGGTCCTACTAATA<br>TCTTTCCTTGGCTTCTTCTTT                                                                                                                                                                                              |
| Cac1 N-half Forward        | CTGTTCCAGGGGCCCTGAAAAGGAAGAAGCTAAAAG<br>AGAAAAGG                                                                                                                                                                                                              |
| Cac1 N-half Reverse        | GGGGACCACTTTGTACAAGAAAGCTGGGTCCTACTAATA<br>CTTAGCTCTTTTTTCTTTTT                                                                                                                                                                                               |
| Cac1 middle-A dsDNA        | GGGGACAAGTTTGTACAAAAAAGCAGGCTTCCTGGAAGT<br>TCTGTTCCAGGGGCCCTGAAACATCGTAAAGAATTACT<br>TCGTCAAGAAGAAAAGAAAAGAAGGAACCTTAAAGTAGA<br>GGAAGAACGGCAGCGGGCGGCTGAACTGAAAAGCAG<br>AAGGAAGAGGAAAACGGCGTAAAGAGGAGGCGCGTTT<br>GGAGGCCAAACGGCGCTAT                          |
| Cac1 middle-B dsDNA        | TAGTAGGACCCAGCTTTTCTTGTACAAAGTGGTCCCC<br>GGGGACAAGTTTGTACAAAAAAGCAGGCTTCCTGGAAGT<br>TCTGTTCCAGGGGCCCTGGTAGAGGAAGAACGGCAGC<br>GGCGGGCTGAACTGAAAAGCAGAAGGAAGAGGAAAAA<br>CGGCGTAAAGAGGAGGCGGCTTTGAGAGGCCAAACGGC<br>GCTATTAGTAGGACCCAGCTTTCTTGTACAAAGTGGTCC<br>CC |
| Cac1 C-half Forward        | CTGTTCCAGGGGCCCTGAGGCGTGCTGAGCTGAAAAA<br>GC                                                                                                                                                                                                                   |



Cac1 C-half Reverse GGGGACCACTTTGTACAAGAAAGCTGGGTCCTACTAATA  
CTCTTTTCTTCTTTT GGC

Myosin 7a SAH dsDNA GGGGACAAGTTTGTACAAAAAAGCAGGCTTCCTGGAAGT  
TCTGTTCCAGGGGCCCTGCGCCTGGAAGCGGAACGCA  
TGCGCCTGGCGGAAGAAGAAAACTGCGCAAAGAAATG  
AGCGCGAAAAAGCGAAAGAAGAAGCGGAACGCAAACA  
TCAGGAACGCCTGGCGCAGCTGGCGCGGAAGATGCG  
GAACGCGAACTGAAAGAAAAAGAAGAAGCGCGCCGCAA  
AAAAGAACTGCTGGAACAGATGGAAAAAGCG  
TATTAGTAGGACCCAGCTTTCTTGTACAAAGTGGTCCCC

CHAF1A dsDNA for GGGGCCCTGGGATCCATGGATTGCAAAGATCGCCCGG  
cloning in pGEX-6P-1 CGTTTCCGGTGAAAAACTGATTACGGCGCGCCTGCCG  
TTCAAGCGCCTGAACCTGGTGCCGAAAGGCAAAGCGGA  
TGATATGAGCGACGATCAAGGTACGAGCGTTCAGAGCA  
AATCGCCGGATCTGGAAGCCAGCCTGGATACGCTGGAA  
ACAACACTGTCACGTGGGTAGCGATATTGACTTTCGCCCG  
AACTGGTTAATGGTAAAGGCCCGCTGGATAATTTTCTG  
CGCAACCGCATTGAAACCAGCATCGGCCAGAGCACCGT  
TATCATTGATCTGACCGAGGATAGCAACGAGCAGCCGG  
ATAGCCTGGTGGATCATAACAACTGAACAGCGAGGCG  
AGCCCGTCGCGCGAGGCGATCAATGGCCAGCGCGAAG  
ACACCGGTGATCAACAGGGTTTACTGAAGGCGATTCAAA  
ATGACAACTGGCCTTCCCGGGTGAACCCCTGAGCGAC  
ATTCCGTGTAAGACCGAGGAAGAAGGTGTGGGTTGTGG  
TGGCGCGGGCCCGCGTGGCGATAGCCAGGAATGCAGC  
CCGCGCAGCTGTCCGGAAGTACGAGCGGTCCGCGCA  
TGTGTCCGCGCAAGGAACAAGATAGCTGGAGCGAGGCC  
GGCGGCATTCTGTTCAAGGGAAAAGTTCCGATGGTTGTT  
CTGCAGGACATTCTGGCGGTGCGCCCTCCGCAGATCAA  
AAGCCTGCCGGCCACGCCGCAAGGCAAAAACATGACGC  
CGGAAAGCGAAGTGCTGGAAAGCTTTCGGAAAGAGGAC  
AGCGTTCTGAGCCATTCGAGCCTGTCGAGCCCGAGCAG  
CACCTCGAGCCCGGAAGGTCTCCGGCCCCGCCGAAG  
CAGCATTGAGCACGAGCCCGTTTCCGACGAGCACCCCC  
GCTGCGTTCGATTACCAAGAAATTTGTGAAAGGTAGCAC  
GGAAAAGAACAACACTGCGCCTGCAACGCGACCAAGAAC  
GCCTGGGTAAGCAACTGAACTGCGCGCCGAGCGCGA  
GGAAAAGGAAAAGCTGAAAGAGGAAGCCAAACGCGCCA  
AGGAGGAGGCGAAGAAAAAAAAGGAGGAAGAAAAGGAA  
CTGAAGGAGAAAAGAGCGCCGTGAAAAGCGCGAAAAGGA  
TGAGAAGGAAAAGCGGAAAAACAACGCCTGAAGGAGG  
AACGCCGTAAAGAACGCCAGGAAGCCCTGGAAGCCAAA  
CTGGAAGAAAACGCAAAAAGGAGGAAGAAAAGCGTCT  
GCGCGAGGAAGAAAAGCGTATCAAAGCGGAAAAGGCGG  
AAATTACCCGCTTCTTCCAGAAGCCGAAGACGCCTCAGG  
CCCCGAAGACGCTGGCGGGTAGCTGTGGTAAATTTGCC  
CCGTTTCGAGATTAAGGAACATATGGTGTGTCGCCCGCG  
TCGCCGCACGGCGTTTCATCCGGACCTGTGCAGCCAGC  
TGGACCAGCTGCTGCAGCAGCAGAGCGGTGAGTTCTCG  
TTCCTGAAGGATTTAAAGGGCCGCCAACCGCTGCGCAG  
CGGTCCGACCCACGTTAGCACGCGCAACGCCGATATCT

```
TCAATAGCGACGTTGTGATCGTGGAGCGCGGCAAAGGC
GACGGTGTTCGGAGCGTCGCAAGTTTGGACGCATGAA
GTTACTGCAATTCTGCGAGAACCATCGCCCGGCCTATTG
GGGCACGTGGAACAAGAAAAGTTCGCGCTGATTCGCGCGC
GTGATCCGTGGGCCAGGATACGAAGTTACTGGACTAC
GAAGTTGATAGCGATGAAGAGTGGGAAGAAGAGGAACC
GGGTGAGAGCCTGTTCGCACAGCGAGGGCGACGATGAT
GACGACATGGGTGAGGATGAGGACGAAGACGATGGTTT
CTTTGTGCCTCATGGTTACCTGAGCGAAGACGAGGGTG
TTACCGAAGAGTGTGCGGACCCGGAAAACCATAAGGTG
CGCCAGAAGCTGAAGGCCAAAGAGTGGGACGAGTTCTT
GGCGAAGGGCAAACGTTTTTCGCGTTCTGCAGCCGGTTA
AAATTGGCTGTGTTTGGGCCGCGGATCGCGACTGCGCG
GGTGATGACCTGAAAGTTCTGCAGCAATTGCGGGCCTG
CTTCCTGGAGACCCTGCCGGCGCAGGAGGAACAAACCC
CGAAAGCCAGCAAACGCGAACGTGCGGATGAGCAGATT
CTGGCGCAGTTACTGCCGTTACTGCATGGCAACGTTAAC
GGTAGCAAAGTGATCATTGCGGAATTCCAGGAGCACTG
CCGTGCGGTTTACTGAGCAATCATACCGGTAGCCCGC
GCACGCCGAGCACCACCTACCTGCATACGCCGACCCCG
AGCGAGGATGCCGCGATTCCGAGCAAGTCGCGCCTGAA
GCGCCTGATTAGCGAAAATAGCGTTTACGAAAAGCGCC
CGGACTTTCGCATGTGTTGGTACGTGCATCCGCAGGTG
CTGCAGAGCTTTCAGCAGGAACATCTGCCGGTTCCGTG
CCAATGGAGCTACGTTACGAGCGTGCCGAGCGCCCCGA
AAGAGGATAGCGGTAGCGTGCCGAGCACGGGTCCGAG
CCAAGGTACCCCGATCAGCCTGAAGCGCAAGAGCGCCG
GTAGCATGTGCATTACCCAATTTATGAAGAAACGTGCGC
ATGACGGCCAGATCGGTGCGGAGGACATGGACGGTTTT
CAAGCGGATACCGAGGAAGAGGAAGAAGAAGAGGGCG
ACTGCATGATTGTTGATGTTCCGGACGCCGTGGAAGTTC
AGGCCCGTGTGGTGCCGCGAGCGGGGCCGGTGGCG
GCGTTGGCGTGGATACCGGAAAAGCGACCCTGACGGCC
AGCCCGCTGGGTGCGAGCTAAGGATCCCCGGAATTCC
GGGGACAAGTTTGTACAAAAAAGCAGGCTTCCTGGAAGT
TCTGTTCCAGGGGCCCTGGAAAAGAACAAACTGCGCC
TGCAACGCGACC
CHAF1A KER (hKER) Forward
CHAF1A KER (hKER) Reverse
CAC1_FLAG_gRNA_F CTTTCCGTTCAAGTTACAAAGACG
CAC1_FLAG_gRNA_R AAACCGTCTTTGTAAGTTGAACGG
mPIP_Δ225-226_gRNA_F CTTTACGTTTAAAAGAAGAAGCCA
mPIP_Δ225-226_gRNA_R AAAGTGGCTTCTTCTTTCAAACGT
mWHD_gRNA_F CTTTAAACAATTAACACCCATAA
mWHD_gRNA_R AAAGTTATGGTGTGTTTAAATTGTT
ΔKER_gRNA_F CTTTAAAGTAGAAGAGGAAAGACAA
ΔKER_gRNA_R AAAGTTGTCTTCTCTTCTACCT
Δ145-149_gRNA_R CTTTGGAAAGAAGCTAAAAGAGAAA
Δ145-149_gRNA_R TTTCTCTTTTAGCTTCTTCC
```

CAC1\_FLAG\_HR\_F CCAATGCAAATATGCCAACCCCGTCTTTGGGATCCGCTG  
GCTCCGCTGCTGGTTCTGGCG  
CAC1\_FLAG\_HR\_M GGTTCTGGCGATTACAAGGATGACGACGATAAGGACTAT  
AAGGACGATGATGACAAGGACTACAAAGATGATGACGAT  
AAATAACTTGAA  
CAC1\_FLAG\_HR\_R TACCAATAAATAATCAGTTTATCTGTATGTTTCTATATACT  
AAAGATCCGTTCAAGTTAT  
CAC1\_mPIP\_HR\_F AAATACGTTTGAAAGAAGAAGCCAAAGAAAGAGCACAAT  
CCCGTATTGGTAACGC  
CAC1\_mPIP\_HR\_M TTGGTAACGCCGCGAAAAAACTAAGCGATTCTAATACGC  
CTGTGGTTGAAAAGTCCGATT  
CAC1\_mPIP\_HR\_R CTCTAACTCCATCTTTAGCATAGAAAGGTAGAAAAAATTT  
TTCATAATCCGACTT  
CAC1\_mWHD\_HR\_F CAGCACGTTTTCTTTGGGTAAGTGTGACTGAAATAGCACA  
GAAAAATTTGCCGCAATACAA  
CAC1\_mWHD\_HR\_M CGCAATACAACAAACAAACAATTGAAAACACCATAGAGG  
AATATGCCATAAGAAGTTCTG  
CAC1\_mWHD\_HR\_R CCAGTTTTGTGCGTCTTTGATTACCCATTTGCGGGGCAA  
ATCACCTTTCCAGAACTTCT  
CAC1\_ΔKER\_HR\_F TACCCAATGGAAATATAATAGCTATCGAGACAAAAAGCA  
GAAGCTCTTCTCCATGCTCTA  
CAC1\_ΔKER\_HR\_M TCTCCATGCTCTAAGAGAGAACTTTCCTCATCGGCACAA  
TCCCGTATTGGTAACTTCTTT  
CAC1\_ΔKER\_HR\_R TCATAATCCGACTTTTTCAACCACAGGCGTATTAGAATCG  
CTTAGTTTTTTAAAGAAGTTA  
CAC1\_ΔKERmPIP\_HR\_M TCTCCATGCTCTAAGAGAGAACTTTCCTCATCGGCACAA  
TCCCGTATTGGTAACGCCGCG  
CAC1\_ΔKERmPIP\_HR\_R TCATAATCCGACTTTTTCAACCACAGGCGTATTAGAATCG  
CTTAGTTTTTTGCGGGCGTTA  
CAC1\_Δ1-2KER\_HR\_F CTAAGAGAGAACTTTCCTCATCGAAAAAGGAAGAAGCTA  
AAAGAGAAAAGGAACTAAAAA  
CAC1\_Δ1-2KER\_HR\_M GAACTAAAAAGCAGCAACGTGCAGAAGAGAAAGAGGA  
GGAAAGATTGAAAAGGAGGAG  
CAC1\_Δ1-2KER\_HR\_R CCAATACGGGATTGTGCTCTTTCCTTGGCTTCTTCTTTCA  
AACGTATTTTCTCCTCCTTT  
CAC1\_2xandHumanKER\_HR\_F GCTATCGAGACAAAAGCAGAAGCTCTTCTCCATGCTCT  
AAGAGAGAACTTTCCTCATCG  
CAC1\_2xandHumanKER\_HR\_R AACCACAGGCGTATTAGAATCGCTTAGTTTTTTAAAGAAG  
TTACCAATACGGGATTGTGC  
CAC1\_Δ225-226\_HR\_F GATTAGAAGCCAAAAGAAGAAAAGAGGAGGAAAGATTGA  
AAAAGGAAGAGGAAATACGTT  
CAC1\_Δ225-22\_HR\_M GAAATACGTTTGAAAGAAGAAGCCAAAGAACAATCCCGT  
ATTGGTAACTTCTTTAAAAA  
CAC1\_Δ225-226\_HR\_R AATTTTTTCATAATCCGACTTTTTCAACCACAGGCGTATTAG  
AATCGCTTAGTTTTTTAAAG  
CAC1\_Δ225-226mPIP\_HR\_M GAAATACGTTTGAAAGAAGAAGCCAAAGAACAATCCCGT  
ATTGGTAAACGCCGCGAAAAA  
CAC1\_Δ225-226mPIP\_HR\_R AATTTTTTCATAATCCGACTTTTTCAACCACAGGCGTATTAG  
AATCGCTTAGTTTTTTGCGG  
CAC1\_Δ145-149\_HR\_F AAAAGCAGAAGCTTCTCCATGCTCTAAGAGAGAAGCTT  
TCCTCATCGAAAAAGGAAGAA

|                    |                                                                                                                                                                                                                                                                                                                                                                                                                                                                                                                                                                                                                                                              |
|--------------------|--------------------------------------------------------------------------------------------------------------------------------------------------------------------------------------------------------------------------------------------------------------------------------------------------------------------------------------------------------------------------------------------------------------------------------------------------------------------------------------------------------------------------------------------------------------------------------------------------------------------------------------------------------------|
| CAC1_Δ145-149_HR_M | AAAGGAAGAAGCTAAAAGAGAAAAGCAACGTGCAGAAG<br>AGAAACACAGAA                                                                                                                                                                                                                                                                                                                                                                                                                                                                                                                                                                                                       |
| CAC1_Δ145-149_HR_R | TTCTACCTTTAGCTCTTTTTTCTTTTTCTTTCTTGTGCGTA<br>ATAACTCTTTTCTGTGTTT                                                                                                                                                                                                                                                                                                                                                                                                                                                                                                                                                                                             |
| Yeast::Human KER   | AAGAGAGAACCTTTCCTCATCGGAAAAAATAAGCTGAGA<br>TTACAACGTGACCAAGAGAGGCTGGGAAAGCAACTTAA<br>CTTAGAGCCGAGCGTGAAGAAAAGGAGAAGCTAAAAGA<br>AGAAGCTAAGAGGGCTAAGGAAGAGGCTAAAAAAGA<br>AAGAAGAAGAGAAAGAGTTGAAAGAGAAAGAAAGGAGG<br>GAAAAACGTGAAAAGGATGAAAAGGAGAAGGCAGAAAA<br>GCAGCGTTTAAAAGAAGAGAGAAGAAAGGAACGTCAAG<br>AAGCATTAGAAGCAAAGCTGGAGGAAAAGAGGAAGAAA<br>GAAGAGGAAAAGAGGTTACGTGAAGAAGAAAAAGAATA<br>AAGGCTGAGGCACAATCCCGTATTGGTAAC                                                                                                                                                                                                                                      |
| 2xKER              | AAGAGAGAACCTTTCCTCATCGAAAAAAGAAGAAGCAAAG<br>AGGGAAAAGGAGCTTAAAAGCAACAACGTGCTGAAGA<br>GAAGCATAGGAAAGAATTGTTGAGACAGGAAGAAAAA<br>GAAGAAAGAAGTGAAGGTGGAGGAAGAGAGACAAAGGA<br>GGGCCGAAGTAAAAAAGCAGAAGGAGGAGGAAAAACGT<br>CGTAAAGAAGAGGCGAGACTAGAGGCGAAAAGGAGAAA<br>AGAAGAAGAAAGTTGAAAAGGAGGAGGAAATTAGGTT<br>AAAAGAAGAAAGCGAAGGAAAAGGAAAAGGAGGAGGCAA<br>AGCGTGAGAAGGAGCTAAAGAAACAGCAACGTGCAGAA<br>GAGAAACACAGAAAGGAGTTGTTGAGGCAGGAAGAAAA<br>AAAAAAAAGGAACTAAAAGTCAAGAAGAAAGACAGAG<br>ACGTGCCGAAGTAAAAAACAAGAAAGAAAGAGAAAGCG<br>TAGAAAGGAAGAAGCAAGGCTTGAAGCAAACGTAGGA<br>AGGAAGAGGAACGTCTGAAGAAAGAGGAGGAGATCAGA<br>CTAAAGGAAGAGGCTAAAGAGAGAGCACAAATCCCGTATT<br>GGTAAC |
| rtt106_HIS_F       | TGTAGTAATAACTATGATGTAAAGGTGCTGGAAACGCTG<br>ACAGCTGAAGCTTCGTACGC                                                                                                                                                                                                                                                                                                                                                                                                                                                                                                                                                                                              |
| rtt106_HIS_R       | TATTCTTCAGGATAAAAAAGTGGTATTTATGAACTCTTA<br>CATAGGCCACTAGTGGATCTG                                                                                                                                                                                                                                                                                                                                                                                                                                                                                                                                                                                             |
| cac1_KAN_F         | ACATTCTGTTATTGCTGTTACAGAGAATTATATGTTTTAG<br>CAGCTGAAGCTTCGTACGC                                                                                                                                                                                                                                                                                                                                                                                                                                                                                                                                                                                              |
| cac1_KAN_R         | TAGTGTGTCGCCTTTTTTCATGTATACCAATAAATAATCA<br>CATAGGCCACTAGTGGATCTG                                                                                                                                                                                                                                                                                                                                                                                                                                                                                                                                                                                            |
| sir2_KAN_F         | CCCATCTCAGAGAAAAACGAGG                                                                                                                                                                                                                                                                                                                                                                                                                                                                                                                                                                                                                                       |
| sir2_KAN_R         | AGCTATTTGTGAGAGCCTTGCGTC                                                                                                                                                                                                                                                                                                                                                                                                                                                                                                                                                                                                                                     |
| bar1_LEU2_F        | GCCAGCTATTCTGAAACACACCAC                                                                                                                                                                                                                                                                                                                                                                                                                                                                                                                                                                                                                                     |
| bar1_LEU2_R        | GCTACTTGTTCAAATTGTGATGGCTGC                                                                                                                                                                                                                                                                                                                                                                                                                                                                                                                                                                                                                                  |
| bar1_LEU2_R        | GCTACTTGTTCAAATTGTGATGGCTGC                                                                                                                                                                                                                                                                                                                                                                                                                                                                                                                                                                                                                                  |

---

1031 **Supplementary Table 3.** List of yeast strains.  
1032

| Strain              | Mutation                          | Genotype                                                                                                | Reference                                        |
|---------------------|-----------------------------------|---------------------------------------------------------------------------------------------------------|--------------------------------------------------|
| W303-1a             |                                   | <i>Mat a ade2-1 leu2-2,112 his3-11,15 trp1 ura3-1 can1-100</i>                                          | ( <a href="#">Thomas and Rothstein, 1989</a> )   |
| RAY160              | rtt106Δ                           | <i>Mat a ade2-1 leu2-2,112 his3-11,15 trp1 ura3-1 can1-100 rtt106::HIS3</i>                             | This study                                       |
| RAY165              | rtt106Δcac1Δ                      | <i>Mat a ade2-1 leu2-2,112 his3-11,15 trp1 ura3-1 can1-100 rtt106::HIS3 cac1::KANMX</i>                 | This study                                       |
| RAY187              | mPIP                              | RAY160 <i>CAC1 F233A/F234A</i>                                                                          | This study                                       |
| RAY180              | mWHD                              | RAY160 <i>CAC1 K564E/K568E</i>                                                                          | This study                                       |
| RAY192              | mPIP + mWHD                       | RAY160 <i>CAC1 F233A/F234A/K564E/K568E</i>                                                              | This study                                       |
| RAY264              | ΔKER)                             | RAY160 <i>CAC1 Δ136-225</i>                                                                             | This study                                       |
| RAY265              | ΔKER + mPIP                       | RAY264 <i>CAC1 F233A/F234A</i>                                                                          | This study                                       |
| RAY266              | ΔKER + mWHD                       | RAY264 <i>CAC1 K564E/K568E</i>                                                                          | This study                                       |
| RAY221              | Δmiddle-AKER                      | RAY160 <i>CAC1 Δ155-204</i>                                                                             | This study                                       |
| RAY222              | Δmiddle-AKER + mPIP               | RAY221 <i>CAC1 F233A/F234A</i>                                                                          | This study                                       |
| RAY223              | Δmiddle-AKER + mWHD               | RAY221 <i>CAC1 K564E/K568E</i>                                                                          | This study                                       |
| RAY245              | 2xKER)                            | RAY160 <i>CAC1 dup(136-225)</i>                                                                         | This study                                       |
| RAY258              | 2xKER + mPIP                      | RAY245 <i>CAC1 F233A/F234A</i>                                                                          | This study                                       |
| RAY247              | 2xKER + mWHD                      | RAY245 <i>CAC1 K564E/K568E</i>                                                                          | This study                                       |
| RAY233              | yeast<br>KER::human KER           | RAY160 <i>CAC1 136-225::hCHAF1A 331-441</i>                                                             | This study                                       |
| RAY256              | yeast<br>KER::human KER<br>+ mPIP | RAY233 <i>CAC1 F233A/F234A</i>                                                                          | This study                                       |
| RAY243              | yeast<br>KER::human KER<br>+ mWHD | RAY233 <i>CAC1 K564E/K568E</i>                                                                          | This study                                       |
| RAY226              | Δ225-226                          | RAY160 <i>CAC1 Δ225-226</i>                                                                             | This study                                       |
| RAY239              | Δ225-226 + mPIP                   | RAY226 <i>CAC1 F223A/F234A</i>                                                                          | This study                                       |
| RAY241              | Δ225-226 + mWHD                   | RAY226 <i>CAC1 K564E/K568E</i>                                                                          | This study                                       |
| RAY207              | Δ145-149                          | RAY160 <i>CAC1 Δ145-149</i>                                                                             | This study                                       |
| RAY216              | Δ145-149 + mPIP                   | RAY207 <i>CAC1 F233A/F234A</i>                                                                          | This study                                       |
| RAY218              | Δ145-149 + mWHD                   | RAY207 <i>CAC1 K564E/K568E</i>                                                                          | This study                                       |
| BY4741              |                                   | <i>Mat a his3Δ1 leu2Δ0 met15Δ0 ura3Δ0</i>                                                               | ( <a href="#">Baker Brachmann et al., 1998</a> ) |
| <sup>a</sup> RAY156 |                                   | <i>Mat a his3Δ1 leu2Δ0 met15Δ0 ura3Δ0 hmr::P<sub>URA3</sub>-GFP/URA3 TRP::BrdU-Inc(TRP) bar1::LEU2</i>  | This study                                       |
| <sup>a</sup> RAY152 | <i>sir2Δ</i>                      | <i>Mat a his3Δ1 leu2Δ0 met15Δ0 ura3Δ0 hmr::P<sub>URA3</sub>-GFP/URA3 TRP::BrdU-Inc(TRP) sir2::KANMX</i> | This study                                       |

|                     |                             |                                                                                                                                 |            |
|---------------------|-----------------------------|---------------------------------------------------------------------------------------------------------------------------------|------------|
| <sup>a</sup> RAY177 | <i>rtt106Δ</i>              | <i>Mat a his3Δ1 leu2Δ0 met15Δ0 ura3Δ0 hmr::P<sub>URA3</sub>-GFP/URA3 TRP::BrdU-Inc(TRP) bar1::LEU2 rtt106::HIS3</i>             | This study |
| <sup>a</sup> RAY179 | <i>cac1Δ</i>                | <i>Mat a his3Δ1 leu2Δ0 met15Δ0 ura3Δ0 hmr::P<sub>URA3</sub>-GFP/URA3 TRP::BrdU-Inc(TRP) bar1::LEU2 cac1::KANMX</i>              | This study |
| <sup>a</sup> RAY189 | <i>rtt106Δcac1Δ</i>         | <i>Mat a his3Δ1 leu2Δ0 met15Δ0 ura3Δ0 hmr::P<sub>URA3</sub>-GFP/URA3 TRP::BrdU-Inc(TRP) bar1::LEU2 rtt106::HIS3 cac1::KANMX</i> | This study |
| RAY193              | mPIP                        | RAY177 CAC1 F233A/F234A                                                                                                         | This study |
| RAY194              | mWHD                        | RAY177 CAC1 K564E/K568E                                                                                                         | This study |
| RAY199              | mPIP + mWHD                 | RAY177 CAC1 F233A/F234A/K564E/K568E                                                                                             | This study |
| RAY205              | ΔKER                        | RAY177 CAC1 Δ136-225                                                                                                            | This study |
| RAY212              | ΔKER + mPIP                 | RAY205 CAC1 F233A/F234A                                                                                                         | This study |
| RAY206              | ΔKER + mWHD                 | RAY205 CAC1 K564E/K568E                                                                                                         | This study |
| RAY219              | Δmiddle-A                   | RAY177 CAC1 Δ155-204                                                                                                            | This study |
| RAY259              | Δmiddle-A + mPIP            | RAY219 CAC1 F233A/F234A                                                                                                         | This study |
| RAY230              | Δmiddle-A + mWHD            | RAY219 CAC1 K564E/K568E                                                                                                         | This study |
| RAY244              | 2xKER                       | RAY177 CAC1 dup(136-225)                                                                                                        | This study |
| RAY263              | 2xKER + mPIP                | RAY244 CAC1 F233A/F234A                                                                                                         | This study |
| RAY246              | 2xKER + mWHD                | RAY244 CAC1 K564E/K568E                                                                                                         | This study |
| RAY232              | yeast KER::human KER        | RAY177 CAC1 136-225::hCHAF1A 331-441                                                                                            | This study |
| RAY257              | yeast KER::human KER + mPIP | RAY232 CAC1 F233A/F234A                                                                                                         | This study |
| RAY242              | yeast KER::human KER + mWHD | RAY232 CAC1 K564E/K568E                                                                                                         | This study |
| RAY225              | Δ225-226                    | RAY177 CAC1 Δ225-226                                                                                                            | This study |
| RAY238              | Δ225-226 + mPIP             | RAY225 CAC1 F223A/F234A                                                                                                         | This study |
| RAY240              | Δ225-226 + mWHD             | RAY225 CAC1 K564E/K568E                                                                                                         | This study |
| RAY208              | Δ145-149                    | RAY177 CAC1 Δ145-149                                                                                                            | This study |
| RAY209              | Δ145-149 + mPIP             | RAY208 CAC1 F233A/F234A                                                                                                         | This study |
| RAY231              | Δ145-149 + mWHD             | RAY208 CAC1 K564E/K568E                                                                                                         | This study |
| RAY191              | CAC1-FLAG                   | <i>Mat a ade2-1 leu2-2,112 his3-11,15 trp1 ura3-1 can1-100 rtt106::HIS3 CAC1-3xFLAG</i>                                         | This study |
| RAY195              | CAC1-FLAG mPIP              | RAY191 CAC1 F233A/F234A                                                                                                         | This study |
| RAY196              | CAC1-FLAG mWHD              | RAY191 CAC1 K564E/K568E                                                                                                         | This study |

|        |                                                |                                                              |            |
|--------|------------------------------------------------|--------------------------------------------------------------|------------|
| RAY197 | CAC1-FLAG<br>mPIP + mWHD                       | RAY191 <i>CAC1</i><br><i>F233A/F234A/K564E/K568E</i>         | This study |
| RAY203 | CAC1-FLAG<br>$\Delta$ KER                      | RAY191 <i>CAC1</i> $\Delta$ 136-225                          | This study |
| RAY214 | CAC1-FLAG<br>$\Delta$ KER + mPIP               | RAY214 <i>CAC1</i> <i>F233A/F234A</i>                        | This study |
| RAY207 | CAC1-FLAG<br>$\Delta$ KER + mWHD               | RAY214 <i>CAC1</i> <i>K564E/K568E</i>                        | This study |
| RAY220 | CAC1-FLAG<br>$\Delta$ middle-A                 | RAY191 <i>CAC1</i> $\Delta$ 155-204                          | This study |
| RAY250 | CAC1-FLAG<br>$\Delta$ middle-A +<br>mPIP       | RAY250 <i>CAC1</i> <i>F233A/F234A</i>                        | This study |
| RAY224 | CAC1-FLAG<br>$\Delta$ middle-A +<br>mWHD       | RAY250 <i>CAC1</i> <i>K564E/K568E</i>                        | This study |
| RAY254 | CAC1-FLAG<br>2xKER                             | RAY191 <i>CAC1</i> <i>dup(136-225)</i>                       | This study |
| RAY255 | CAC1-FLAG<br>2xKER + mPIP                      | RAY254 <i>CAC1</i> <i>F233A/F234A</i>                        | This study |
| RAY261 | CAC1-FLAG<br>2xKER + mWHD                      | RAY254 <i>CAC1</i> <i>K564E/K568E</i>                        | This study |
| RAY262 | CAC1-FLAG<br>yeast<br>KER::human KER           | RAY191 <i>CAC1</i> <i>136-225::hCHAF1A</i><br><i>331-441</i> | This study |
| RAY260 | CAC1-FLAG<br>yeast<br>KER::human KER<br>+ mPIP | RAY262 <i>CAC1</i> <i>F233A/F234A</i>                        | This study |
| RAY253 | CAC1-FLAG<br>yeast<br>KER::human KER<br>+ mWHD | RAY262 <i>CAC1</i> <i>K564E/K568E</i>                        | This study |
| RAY229 | CAC1-FLAG<br>$\Delta$ 225-226                  | RAY191 <i>CAC1</i> $\Delta$ 225-226                          | This study |
| RAY248 | CAC1-FLAG<br>$\Delta$ 225-226 + mPIP           | RAY248 <i>CAC1</i> <i>F223A/F234A</i>                        | This study |
| RAY249 | CAC1-FLAG<br>$\Delta$ 225-226 +<br>mWHD        | RAY229 <i>CAC1</i> <i>K564E/K568E</i>                        | This study |
| RAY215 | CAC1-FLAG<br>$\Delta$ 145-149                  | RAY191 <i>CAC1</i> $\Delta$ 145-149                          | This study |
| RAY251 | CAC1-FLAG<br>$\Delta$ 145-149 + mPIP           | RAY251 <i>CAC1</i> <i>F233A/F234A</i>                        | This study |
| RAY217 | CAC1-FLAG<br>$\Delta$ 145-149 +<br>mWHD        | RAY251 <i>CAC1</i> <i>K564E/K568E</i>                        | This study |

1033 <sup>a</sup> *BrdU-Inc*(Viggiani and Aparicio, 2006); *hmr::PURA3-GFP/URA3*(Laney and Hochstrasser,  
1034 2003).

1035 **Supplementary Table 4.** Statistics for crystallographic data collection and refinement.  
1036

| <u>Data statistics</u>             | MBP-KER (PDB: 8DEI)                                                                        |
|------------------------------------|--------------------------------------------------------------------------------------------|
| Spacegroup                         | P2 <sub>1</sub>                                                                            |
| Cell dimensions (Å)                | a=53.586 b=165.249<br>c=116.149<br>$\alpha=90^\circ$ $\beta=96.47^\circ$ $\gamma=90^\circ$ |
| Resolution range (Å)               | 26.68 - 2.81 (2.9? - 2.81) <sup>a</sup>                                                    |
| Total reflections                  | 188,138 (13,259) <sup>a</sup>                                                              |
| Unique reflections                 | 48320 (4400) <sup>a</sup>                                                                  |
| Redundancy                         | 3.9 (3.0) <sup>a</sup>                                                                     |
| R <sub>sym</sub> <sup>b</sup> (%)  | 17.6 (68.9) <sup>a</sup>                                                                   |
| Completeness (%)                   | 97.76 (90.08) <sup>a</sup>                                                                 |
| Intensity (I/ $\sigma$ )           | 7.3 (???) <sup>a</sup>                                                                     |
| CC1/2                              | .979 (695)                                                                                 |
| Wilson B factor (Å <sup>2</sup> )  | 46.75                                                                                      |
| <u>Refinement statistics</u>       |                                                                                            |
| Resolution Range (Å)               | 28.68 - 2.81 (2.91 - 2.81) <sup>a</sup>                                                    |
| Unique reflections                 | 47,773 (4364)                                                                              |
| Rfree <sup>c</sup> (%)             | 28.25 (35.43) <sup>a</sup>                                                                 |
| Rworking (%)                       | 23.30 (29.20) <sup>a</sup>                                                                 |
| <u>Final Model</u>                 |                                                                                            |
| Number of protein atoms            | 14,659                                                                                     |
| Number of heteroatoms              | 106                                                                                        |
| Number of solvent atoms            | 11                                                                                         |
| Average B factor (Å <sup>2</sup> ) | 51.56                                                                                      |
| R.m.s.d. bond lengths (Å)          | 0.001                                                                                      |
| R.m.s.d. bond angles (°)           | 0.342                                                                                      |
| Molprobity score                   | 1.39                                                                                       |
| Ramachandran Analysis              | 96.44% most favored; 3.56% allowed; 0% outlier                                             |

1037 <sup>a</sup> High resolution shell

1038 <sup>b</sup>  $R_{sym} = \sum |I - \langle I \rangle| / \sum I$

1039 <sup>c</sup>  $R_{free}$  calculated with an excluded set of 10%

1040



1041 **Supplementary References**  
1042

1043 Laney, Jeffrey D., and Mark Hochstrasser. 2003. 'Ubiquitin-dependent degradation of the yeast  
1044 Mata2 repressor enables a switch in developmental state', *Genes and Development*, 17:  
1045 2259-70.

1046 Viggiani, Christopher J., and Oscar M. Aparicio. 2006. 'New vectors for simplified construction of  
1047 BrdU-Incorporating strains of *Saccharomyces cerevisiae*', *Yeast*, 23: 1045-51.

1048  
1049

1050 **Source Data Files – Legends**

1051

1052 **Figure 1 - Source data 1. The yKER region favors binding to tetrasome-length DNA and**  
1053 **facilitates the function of yCAF-1 *in vivo*.** EMSA images (panels b, c, d and e) and data  
1054 analyses (panel j).

1055

1056 **Figure 1 - Source data 2. The yKER region favors binding to tetrasome-length DNA and**  
1057 **facilitates the function of yCAF-1 *in vivo*.** EMSA images (panels f, g, h, i and m), data  
1058 analyses (panel k and l) and flow cytometry data (panel o).

1059

1060 **Figure 1 - figure supplement 1 - Source data 1. Quality of proteins used in this study.**  
1061 SDS-PAGE (panels a-c) and Western blots (panel d)

1062

1063 **Figure 1 - figure supplement 2 - Source data 1. CAF-1 DNA binding analysis and *in vivo***  
1064 **assays.** EMSA images (panels a and b), data analyses (panel c) and flow cytometry data (panel  
1065 f)

1066

1067 **Figure 2 - Source data 1. The yKER is a single alpha-helix (SAH) domain that forms a**  
1068 **stable complex with DNA.** Circular dichroism data (panels c and d)

1069

1070 **Figure 2 - figure supplement 1 - Source data 1. MBP-yKER oligomeric properties.** EMSA  
1071 images and data analyses (panels d and e)

1072

1073 **Figure 2 - figure supplement 2 - Source data 1. DNA binding properties of the yKER.**  
1074 Circular dichroism data (panel a) and EMSA images (panel b)

1075

1076 **Figure 3 - Source data 1. The yKER middle region is required for DNA binding and yCAF-1**  
1077 **function *in vivo*.** Circular dichroism data (panel b), EMSA images (panels c-h), Flow cytometry  
1078 data (panel j) and data analyses (panels c-f, j).

1079

1080 **Figure 4 - Source data 1. The yKER confers DNA-length selectivity to yCAF-1.** EMSA  
1081 images and data analyses

1082

1083 **Figure 5 - Source data 1. The length and the phase of the yKER SAH modulates yCAF-1**  
1084 **functions *in vivo*.** EMSA images (panel a) and Flow cytometry data (panel c).

1085

1086 **Figure 5 - figure supplement 1 - Source data 1. Analysis of the yKER length.** EMSA images  
1087 and data analyses (panel a)

1088

1089 **Figure 6 - Source data 1. DNA-length selectivity by the KER is species specific and its**  
1090 **function is not conserved *in vivo*.** EMSA images and data analyses (panels b and c) and  
1091 Flow cytometry data and analyses (panel e)

1092

1093 **Figure 6 - figure supplement 1 - Source data 1. Analysis of the substitution of the yKER**  
1094 **with the hKER.** Circular dichroism data (panels b and c)

1095
